# Supplementary material for: Facile synthesis of recyclable polythioimidocarbonates via aromatization-driven alternating copolymerization of para -quinone methide and isothiocyanates
Source: Royal Society of Chemistry journal article supplement (doi:10.1039/d5sc00050e), 2025-01-01
Supplement: d5sc00050e1.pdf [file d5sc00050e1.pdf]

Supporting Information for

**Facile Synthesis of Recyclable Polythioimidocarbonates via  
Aromatization-driven Alternating Copolymerization of *para*-Quinone  
Methide and Isothiocyanates**

Wen-Dao Chu,<sup>\*a</sup> Si-Yu Dan,<sup>a</sup> Jie Zhan,<sup>a</sup> Bo Chen,<sup>a</sup> Ji Xian,<sup>b</sup> Chun-Mei Wang,<sup>a</sup> Quan-Zhong Liu,<sup>a</sup> Jincai Wu,<sup>\*b</sup> and Chun-An Fan<sup>\*b</sup>

<sup>a</sup>Chemical Synthesis and Pollution Control Key Laboratory of Sichuan Province, College of Chemistry and Chemical Engineering, China West Normal University, Nanchong 637002, P.R. China.

<sup>b</sup>State Key Laboratory of Applied Organic Chemistry, College of Chemistry and Chemical Engineering, Lanzhou University, 222 Tianshui Nanlu, Lanzhou 730000, China

TABLE OF CONTENTS

|                                                                 |     |
|-----------------------------------------------------------------|-----|
| Materials, Reagents, and Methods.....                           | S2  |
| Synthesis of <i>p</i> -QM.....                                  | S3  |
| Procedure for polymerization and polymer characterizations..... | S5  |
| Kinetic studies and control experiments.....                    | S11 |
| Thermal properties of polymers.....                             | S19 |
| Chemical Recycling to Monomer.....                              | S20 |
| DFT Study.....                                                  | S21 |
| References.....                                                 | S61 |

## Experimental Details

### Materials, Reagents, and Methods

All syntheses and manipulations of air- and moisture-sensitive materials were performed under a dry nitrogen atmosphere in a glovebox or using standard Schlenk techniques.  $^1\text{H}$  NMR and  $^{13}\text{C}$  NMR spectra were recorded respectively at 400 MHz and 100 MHz on Bruker Avance 400M.  $^1\text{H}$  NMR chemical shifts are reported in ppm relative to residual protons in deuterated solvent. The chemical shift for chloroform-d is  $\delta$  7.26 ppm.  $^{13}\text{C}$  NMR chemical shifts are reported in ppm versus residual  $^{13}\text{C}$  in the solvent:  $\delta$  77.0 ppm for chloroform-d. The molecular weights ( $M_n$  and  $M_w$ ) and the molecular mass distributions ( $M_w/M_n$ ) of the polymer samples were measured by gel permeation chromatography (GPC) at 30 °C using THF as a solvent, an eluent flow rate of 1 mL/min, and narrow polystyrene standards as reference samples. The measurements were performed using a Waters 1525 system that was equipped with a Waters 2414 Refractive Index detector using WAT054405 Styragel columns. Matrix-Assisted Laser Desorption/Ionization Time of Flight (MALDI-TOF) Mass Spectrometry conditions were as follows. Instrument type: Bruker autoflex speed MALDI-TOF mass spectrometer, adjust to reflection mode, Power 80, P. Ext at 5000.00. The MALDI-TOF mass spectroscopic data were obtained using trans-2-[3-(4-tertbutylphenyl)-2-methyl-2-propenylidene]alonnitrile (DCTB) as the matrix (10 mg/mL in THF), sodium trifluoroacetate as the cationization agent (10 mg/mL in THF) and samples were dissolved in THF (10 mg/mL). The solutions of samples, matrix and salt were mixed in a volume ratio of 1:1:1; then the mixed solution (1  $\mu\text{L}$ ) was hand-spotted on a stainless steel MALDI target, which allowed to be dried completely. Differential scanning calorimetry (DSC) measurements: using 10-15 mg of material, DSC experiments were performed on a DZ-DSC300C instrument with a heat (0-160 °C) at a heating rate of 20 °C/min and cooling rate of 10 °C/min under  $\text{N}_2$  atmosphere. Thermal gravimetric analyzer (TGA): using 10-15 mg of material, TGA experiments were performed on a Linseis PT 1600 instrument, with a heat (25-500 °C) at a rate of 10 °C/min under  $\text{N}_2$  atmosphere. Decomposition temperatures ( $T_d$ , defined by the temperature of 5 % weight loss).

Toluene, THF, and hexane were dried by refluxing with sodium and benzophenone ketyl, the latter serves as an indicator.  $\text{CH}_2\text{Cl}_2$  was distilled from  $\text{CaH}_2$ . 1,5,7-Triazabicyclo[4.4.0]dec-5-ene (TBD), 4-Dimethylaminopyridine (DMAP), *p*-methoxybenzoic acid, and isothiocyanate **1b-1c** were purchased from Energy Chemical

and purified via vacuum sublimation. Isothiocyanates **1a** and **1d** were distilled under reduced pressure before use. Phthalic acids **2b-2d** were dehydrated by stirring overnight at 100 °C under vacuum. *p*-QM was dehydrated by stirring overnight at 50 °C under vacuum.

### Synthesis of *p*-QM

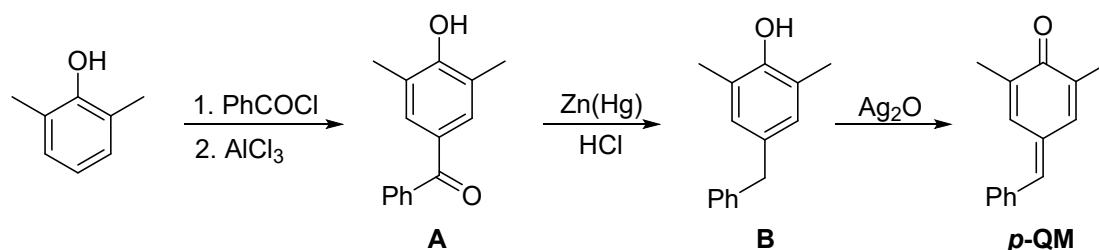

*p*-QM was prepared according to literature procedures.<sup>1</sup> A mixture of 2,6-xyleneol (6.1 g, 50 mmol) and benzoyl chloride (7.0 g, 50 mmol) was heated at 140 °C for 4 h with stirring. To the mixture was added 8.5 g (63 mmol) of aluminum chloride and then the mixture was stirred at 170 °C for 45 min. After the mixture cooled to 0 °C, aqueous hydrochloric acid (6 N) was added to quench the reaction, and the resulting mixture was extracted with CH<sub>2</sub>Cl<sub>2</sub> (100 mL × 3). The extracts were combined, washed twice with brine, and dried over anhydrous magnesium sulfate. After the solvent evaporated, a residual solid was recrystallized from a mixed solution of ethyl acetate and hexane (1/5 v/v) to give 9.8 g (76%) of **A** as white plates. Zinc powder (58 g, 880 mmol) was added to a solution of mercuric chloride (0.8 g, 2.9 mmol) in 80 mL of water, and the mixture was stirred at room temperature for 30 min. The supernatant water was decanted off, and the precipitate was washed twice with water. Then, 80 mL of water and 60 mL of concentrated hydrochloric acid were added. To the suspension was added a solution of 18 g (78 mmol) of **A** in 100 mL of ethanol, and the mixture was refluxed for 8 h. After cooling to room temperature, the reaction mixture was extracted twice with diethyl ether. The extracts were combined, washed with brine, and dried over magnesium sulfate. After the diethyl ether evaporated, the residual pale yellow oil was distilled under reduced pressure to give 9.4 g (56%) of **B** as white needles. **B** (3.6 g, 17 mmol) was dissolved in 200 mL of diethyl ether, and to the solution was added 7.2 g (32 mmol) of silver oxide; the mixture was stirred at room temperature for 4 h. The reaction mixture was filtered to remove silver oxide, and then the diethyl ether was

evaporated. The residual solid was recrystallized from hexane to give 2.6 g (75%) of *p*-QM as yellow needles.  $^1\text{H NMR}$  (400 MHz,  $\text{CDCl}_3$ , ppm)  $\delta$  7.52 (s, 1H), 7.48 – 7.37 (m, 5H), 7.17 (s, 1H), 7.05 (s, 1H), 2.06 (dd,  $J = 3.1, 1.0$  Hz, 6H).  $^{13}\text{C NMR}$  (100 MHz,  $\text{CDCl}_3$ , ppm)  $\delta$  187.5, 142.8, 139.0, 137.8, 135.9, 135.8, 132.0, 131.5, 130.6, 129.4, 128.9, 17.0, 16.4.

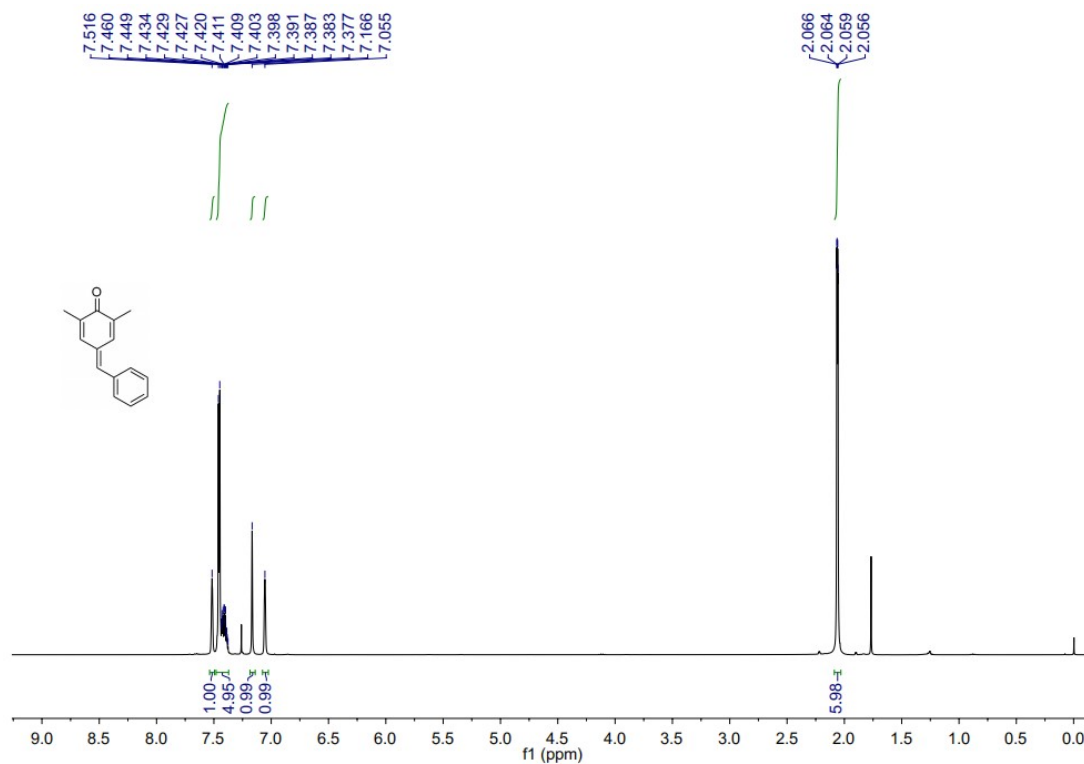

**Figure S1.**  $^1\text{H NMR}$  ( $\text{CDCl}_3$ ) spectrum of *p*-QM.

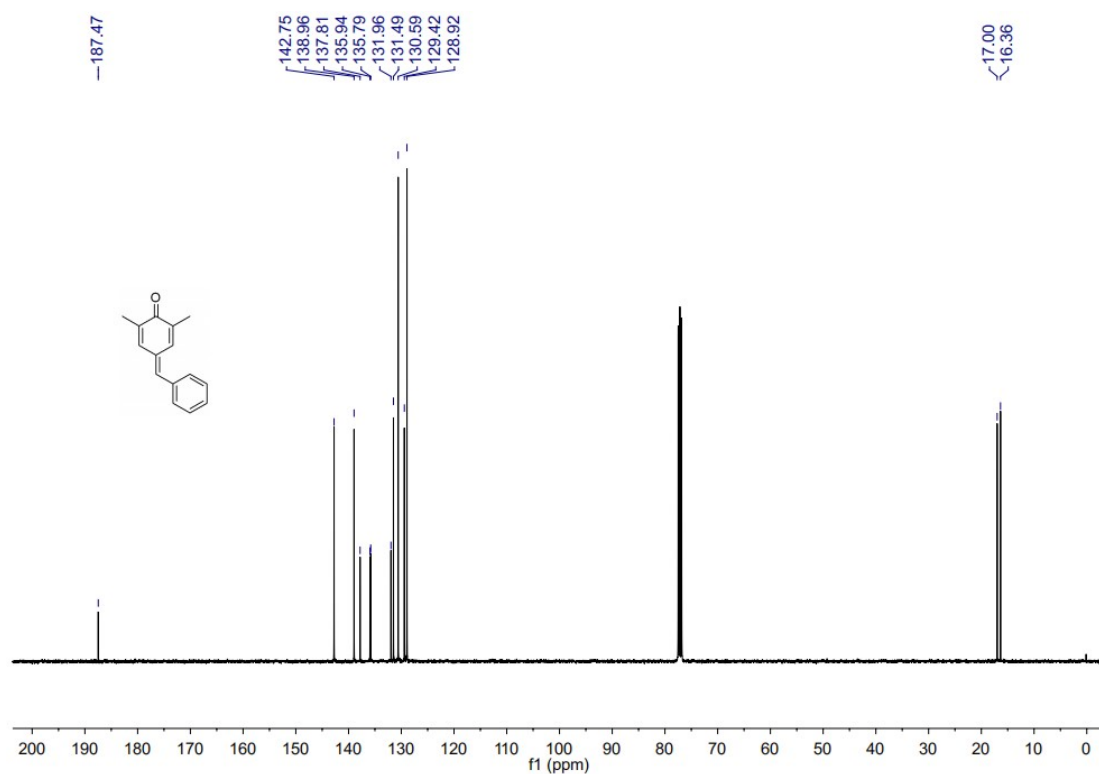

**Figure S2.**  $^{13}\text{C}$  NMR ( $\text{CDCl}_3$ ) spectrum of *p*-QM.

### Procedure for polymerization

Polymerizations were performed in 10 mL glass reactors inside the glovebox. In a typical polymerization reaction, the reactor was charged with *p*-QM, isothiocyanate and THF. Acid catalyst was introduced into the mixture and stirred for 2 minutes. Then TBD was added to the resulting solution. The mixture was stirred at room temperature. After a desired period of time, an aliquot was withdrawn to determine *p*-QM conversion by  $^1\text{H}$  NMR spectroscopy, and the remaining solution was quenched with a few drops of MeOH. The polymer was precipitated by adding hexane (10 mL). Polymer was obtained by recrystallization from a  $\text{CH}_2\text{Cl}_2$ /hexane mixed solvent and dried in a vacuum oven at 60 °C to a constant weight.

**Table S1.** Raw data over equilibrium conversion at various ratios of isothiocyanate<sup>a</sup>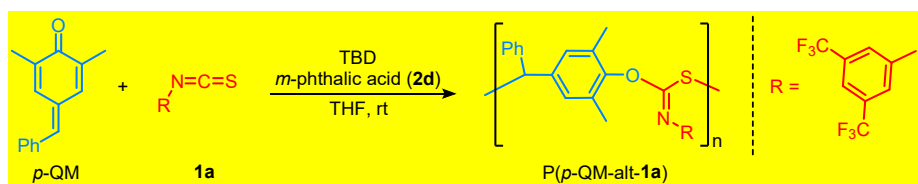

| entry | feeding                                                 | time (h) | conv. (%) <sup>b</sup> | $M_{n,theo}$ (kDa) <sup>c</sup> | $M_{n,GPC}$ (kDa) <sup>d</sup> | $\bar{D}$ <sup>d</sup> |
|-------|---------------------------------------------------------|----------|------------------------|---------------------------------|--------------------------------|------------------------|
| 1     | <i>p</i> -QM/ <b>1a</b> /TBD/ <b>2d</b> (100/100/1/0.5) | 1.0      | 70                     | 33.8                            | 38.1                           | 1.23                   |
| 2     | <i>p</i> -QM/ <b>1a</b> /TBD/ <b>2d</b> (100/200/1/0.5) | 1.0      | 82                     | 39.6                            | 45.4                           | 1.24                   |
| 3     | <i>p</i> -QM/ <b>1a</b> /TBD/ <b>2d</b> (100/300/1/0.5) | 1.0      | 90                     | 43.5                            | 48.6                           | 1.24                   |
| 4     | <i>p</i> -QM/ <b>1a</b> /TBD/ <b>2d</b> (100/400/1/0.5) | 1.0      | 97                     | 46.8                            | 51.2                           | 1.23                   |

<sup>a</sup>The copolymerization was conducted in THF in a glovebox at 25 °C,  $[p\text{-QM}]_0 = 0.5$  M. <sup>b</sup>Conversion of *p*-QM, determined by <sup>1</sup>H NMR spectroscopy. <sup>c</sup>Calculated molar mass based on  $[p\text{-QM}]_0/[TBD]_0$  ratio and conversion. <sup>d</sup> $M_n$  and  $\bar{D}$  were determined by GPC analysis in THF.

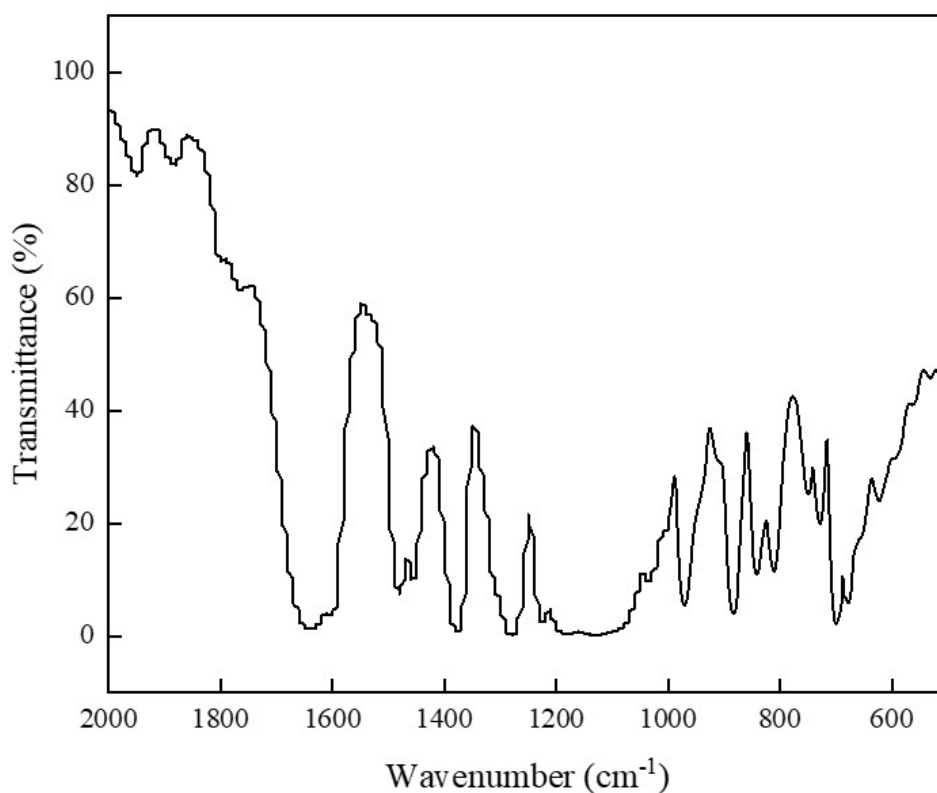**Figure S3.** Fourier-transform infrared (FTIR) spectrum of P(*p*-QM-alt-**1a**)

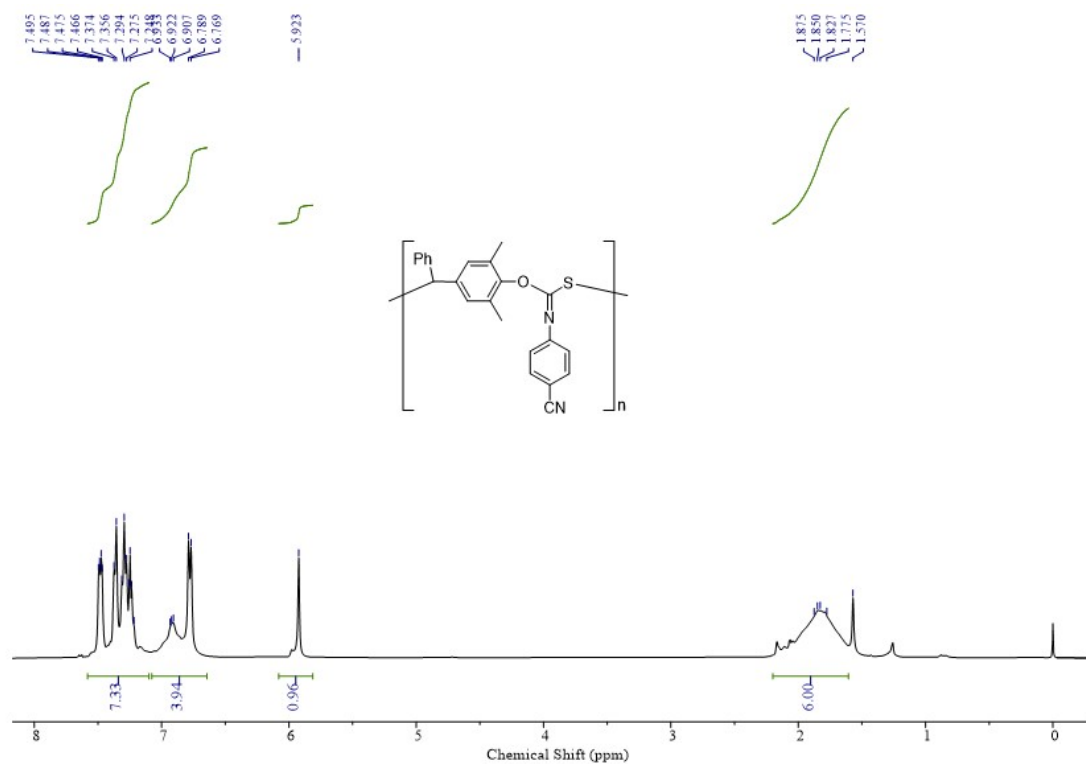

**Figure S4.**  $^1\text{H}$  NMR ( $\text{CDCl}_3$ ) spectrum of  $\text{P}(p\text{-QM-alt-1b})$  obtained by  $[p\text{-QM}]/[\mathbf{1b}]/[\text{TBD}]/[\mathbf{2d}] = 100/400/1/0.5$

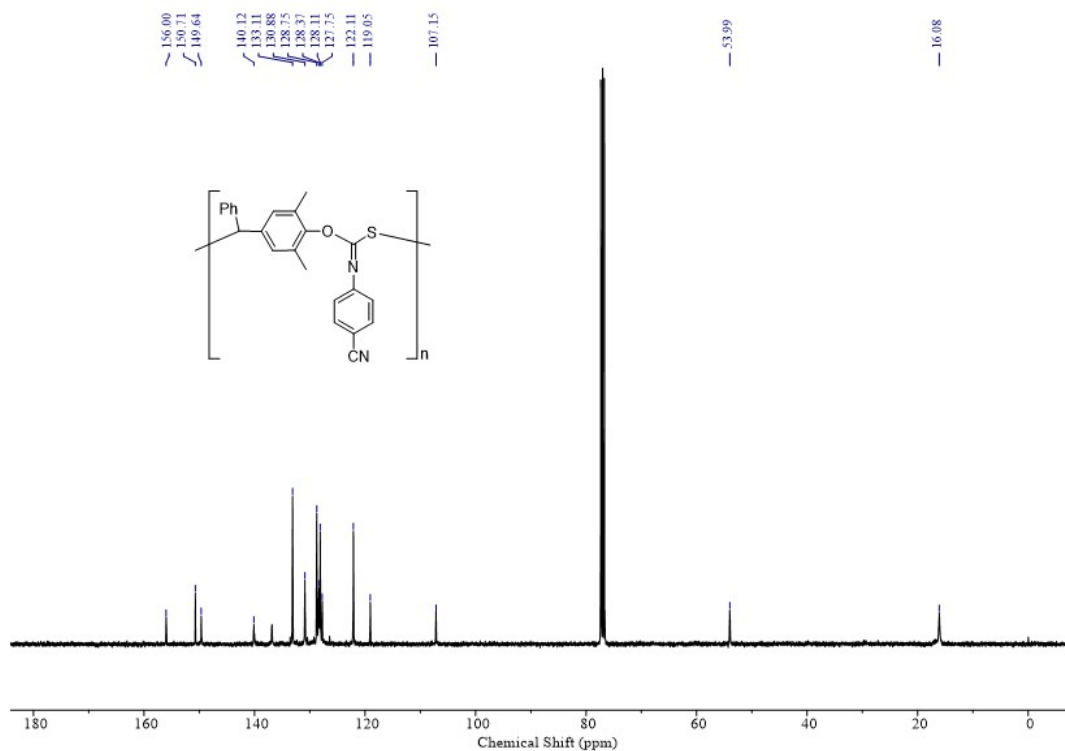

**Figure S5.**  $^{13}\text{C}$  NMR ( $\text{CDCl}_3$ ) spectrum of  $\text{P}(p\text{-QM-alt-1b})$  obtained by  $[p\text{-QM}]/[\mathbf{1b}]/[\text{TBD}]/[\mathbf{2d}] = 100/400/1/0.5$

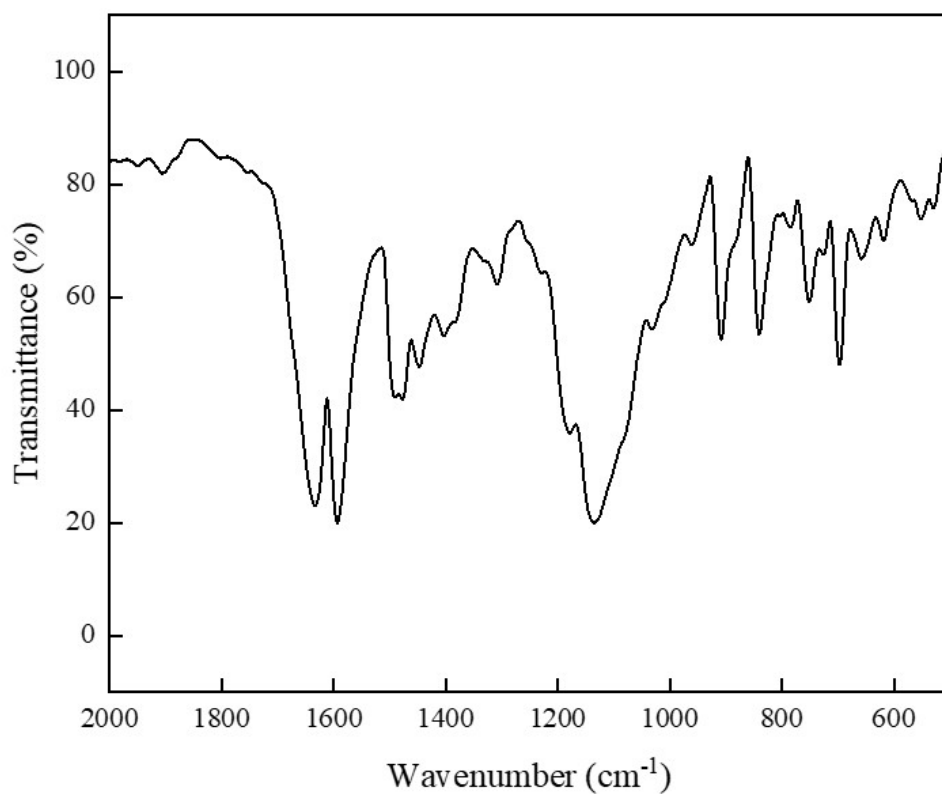

**Figure S6.** Fourier-transform infrared (FTIR) spectrum of P(*p*-QM-alt-1b)

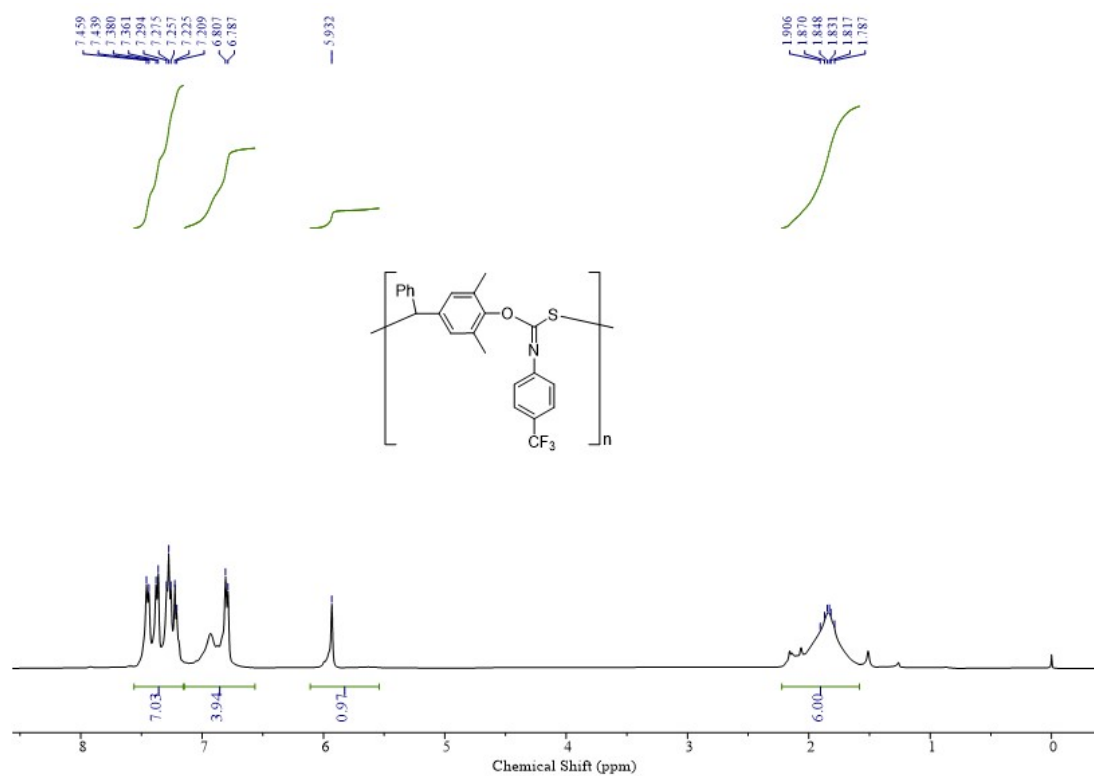

**Figure S7.** <sup>1</sup>H NMR (CDCl<sub>3</sub>) spectrum of P(*p*-QM-alt-1c) obtained by [*p*-QM]/[1c]/[TBD]/[2d] = 100/400/1/0.5



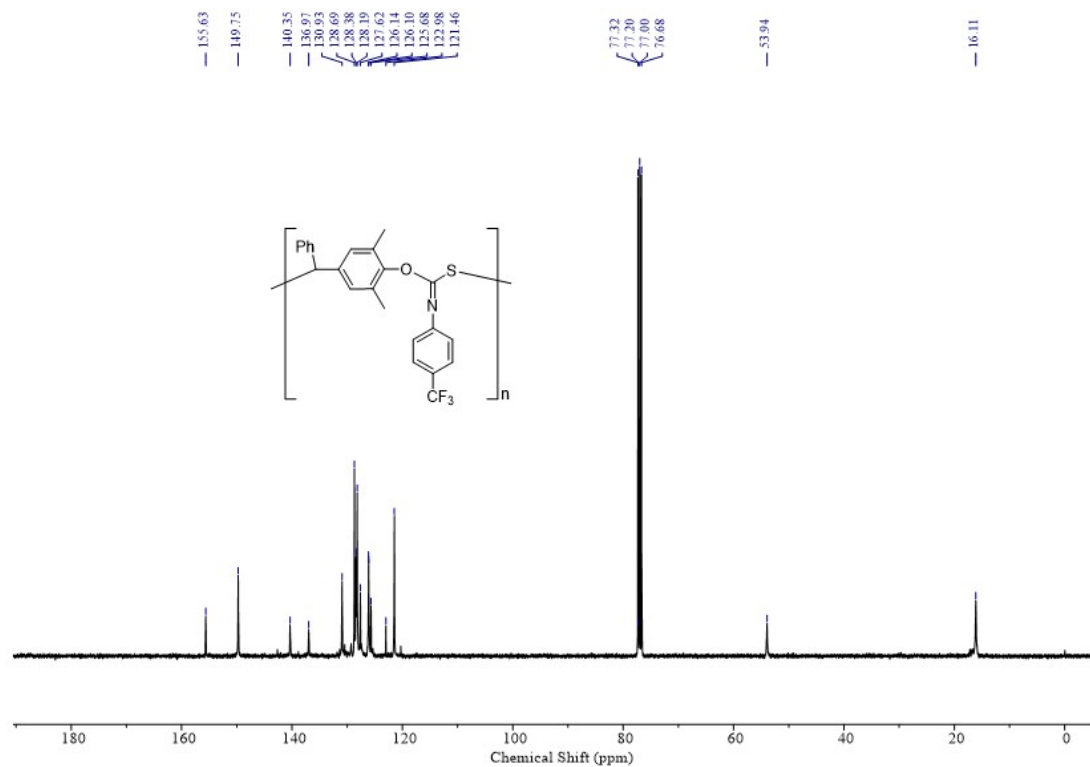

**Figure S8.** <sup>13</sup>C NMR (CDCl<sub>3</sub>) spectrum of P(*p*-QM-alt-**1c**) obtained by [*p*-QM]/[**1c**]/[TBD]/[**2d**] = 100/400/1/0.5

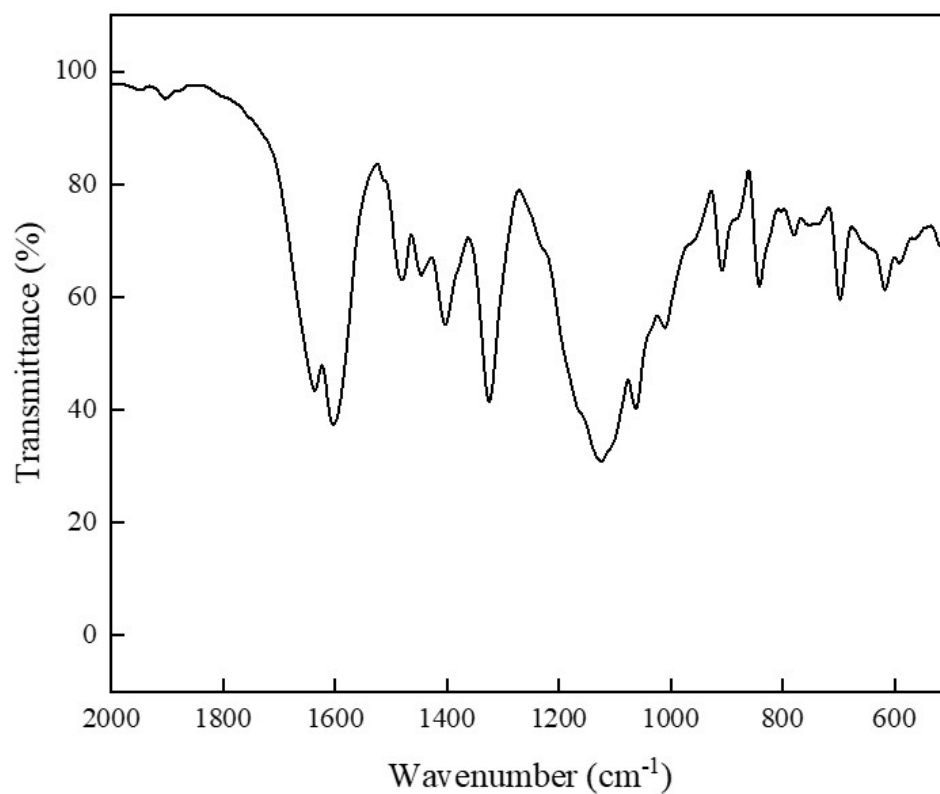

**Figure S9.** Fourier-transform infrared (FTIR) spectrum of P(*p*-QM-alt-**1c**)

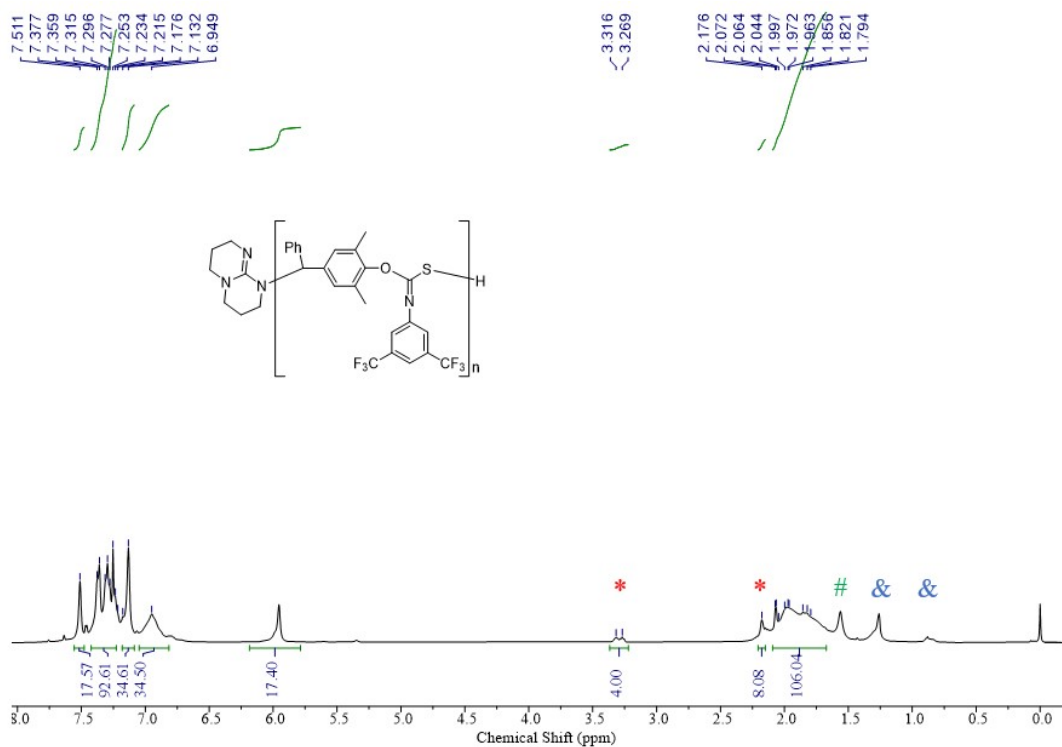

**Figure S10.** <sup>1</sup>H NMR (CDCl<sub>3</sub>) spectrum of P(*p*-QM-alt-**1a**) obtained by [*p*-QM]/[**1a**]/[TBD]/[**2d**] = 15/60/1/0.5. (\*TBD, # H<sub>2</sub>O, & *n*-hexane)

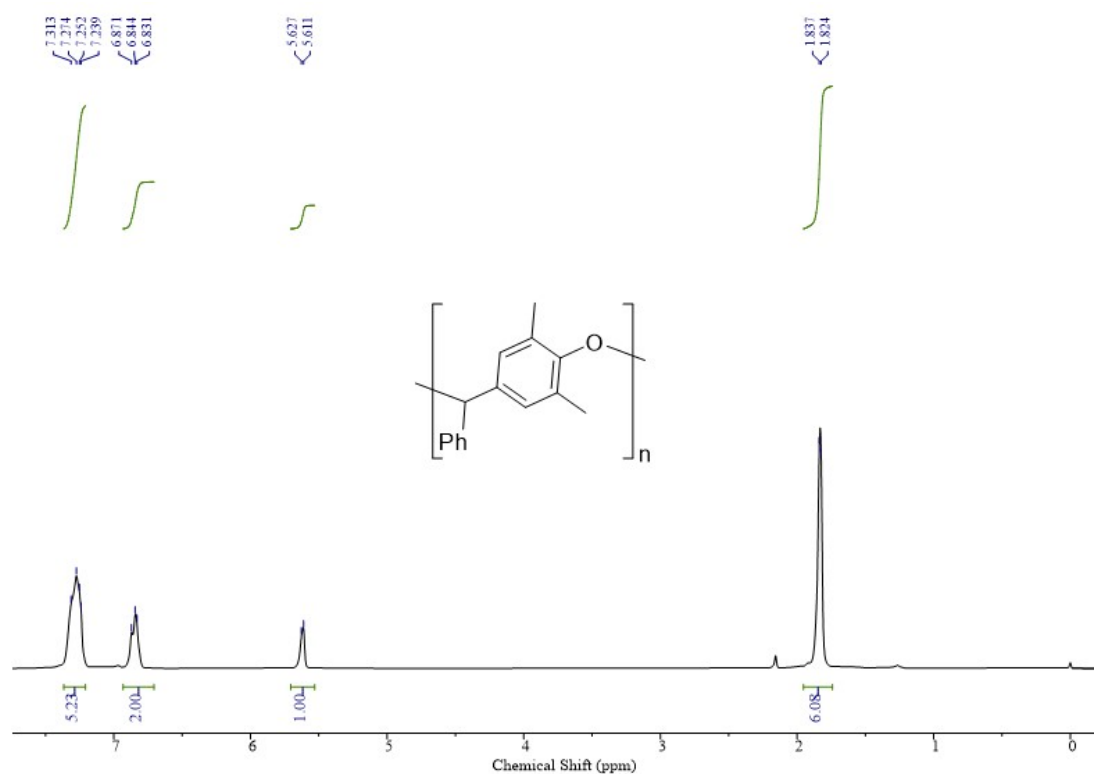

**Figure S11.** <sup>1</sup>H NMR (CDCl<sub>3</sub>) spectrum of *p*-QM homopolymerization.

### Typical procedure of kinetic studies

In a glovebox, a mixture of *p*-QM (52.5 mg, 0.25 mmol), isothiocyanate **1a** (182  $\mu$ L, 271 mg, 1.0 mmol), acid catalyst **2d** (0.21 mg, 0.00125 mmol) and 0.4 mL of THF-*d*<sup>8</sup> was added to a J Youngs tap NMR tube. Then, a 0.1 mL solution of TBD in THF-*d*<sup>8</sup> (0.35 mg, 0.0025 mmol) was added to the resulting solution. The reaction took place at room temperature. <sup>1</sup>H NMR spectroscopic studies were used to analyze the *p*-QM conversion.

Other kinetic studies with different equivalents of **1a**, acid or initiator were carried out in a similar manner.

**Table S2.** Kinetic studies of *p*-QM/**1a** copolymerization at fixed *p*-QM-to-catalyst ratio ( $[\mathbf{2d}]_0/[\text{TBD}]_0/[p\text{-QM}]_0/[\mathbf{1a}]_0 = 1:2:200:800$ )<sup>a</sup>

| Entry | $[\mathbf{2d}]_0/[\text{TBD}]_0/[p\text{-QM}]_0/[\mathbf{1a}]_0$ | Time (min) | % <i>p</i> -QM Conv. <sup>b</sup> | $\ln([p\text{-QM}]_0/[p\text{-QM}]_t)$ |
|-------|------------------------------------------------------------------|------------|-----------------------------------|----------------------------------------|
| S1    | 1:2:200:800                                                      | 12         | 21                                | 0.236                                  |
| S2    | 1:2:200:800                                                      | 16         | 34                                | 0.416                                  |
| S3    | 1:2:200:800                                                      | 20         | 45                                | 0.598                                  |
| S4    | 1:2:200:800                                                      | 23         | 55                                | 0.799                                  |
| S5    | 1:2:200:800                                                      | 27         | 62                                | 0.968                                  |
| S6    | 1:2:200:800                                                      | 30         | 71                                | 1.238                                  |
| S7    | 1:2:200:800                                                      | 35         | 77                                | 1.470                                  |
| S8    | 1:2:200:800                                                      | 39         | 82                                | 1.715                                  |
| S9    | 1:2:200:800                                                      | 44         | 86                                | 1.966                                  |
| S10   | 1:2:200:800                                                      | 48         | 88                                | 2.120                                  |
| S11   | 1:2:200:800                                                      | 52         | 90                                | 2.302                                  |
| S12   | 1:2:200:800                                                      | 56         | 92                                | 2.526                                  |

Copolymerization conditions: 0.00125 mmol catalyst **2d**, 0.5 mL THF-*d*<sup>8</sup>, rt. <sup>a</sup>All runs showed excellent copolymerization selectivity based on <sup>1</sup>H NMR determination. <sup>b</sup>Based on <sup>1</sup>H NMR analysis of the reaction mixture.

**Table S3.** Kinetic studies of *p*-QM/**1a** copolymerization at different **1a**-to-catalyst ratio<sup>a</sup>

| Entry | [ <b>2d</b> ] <sub>0</sub> /[TBD] <sub>0</sub> /[ <i>p</i> -QM] <sub>0</sub> /[ <b>1a</b> ] <sub>0</sub> | Time (min) | % <i>p</i> -QM Conv. <sup>b</sup> | ln([ <i>p</i> -QM] <sub>0</sub> /[ <i>p</i> -QM] <sub>t</sub> ) |
|-------|----------------------------------------------------------------------------------------------------------|------------|-----------------------------------|-----------------------------------------------------------------|
| S1    | 1:2:200:600                                                                                              | 6          | 6                                 | 0.062                                                           |
| S2    | 1:2:200:600                                                                                              | 10         | 19                                | 0.211                                                           |
| S3    | 1:2:200:600                                                                                              | 14         | 36                                | 0.446                                                           |
| S4    | 1:2:200:600                                                                                              | 19         | 55                                | 0.799                                                           |
| S5    | 1:2:200:600                                                                                              | 23         | 68                                | 1.139                                                           |
| S6    | 1:2:200:600                                                                                              | 27         | 75                                | 1.386                                                           |
| S7    | 1:2:200:600                                                                                              | 31         | 81                                | 1.661                                                           |
| S8    | 1:2:200:600                                                                                              | 36         | 88                                | 2.120                                                           |
| S9    | 1:2:200:600                                                                                              | 40         | 90                                | 2.303                                                           |
| S10   | 1:2:200:600                                                                                              | 44         | 92                                | 2.526                                                           |
| S11   | 1:2:200:600                                                                                              | 48         | 93                                | 2.659                                                           |
| S12   | 1:2:200:600                                                                                              | 52         | 94                                | 2.813                                                           |
| S13   | 1:2:200:800                                                                                              | 12         | 21                                | 0.236                                                           |
| S14   | 1:2:200:800                                                                                              | 16         | 34                                | 0.416                                                           |
| S15   | 1:2:200:800                                                                                              | 20         | 45                                | 0.598                                                           |
| S16   | 1:2:200:800                                                                                              | 23         | 55                                | 0.799                                                           |
| S17   | 1:2:200:800                                                                                              | 27         | 62                                | 0.968                                                           |
| S18   | 1:2:200:800                                                                                              | 30         | 71                                | 1.238                                                           |
| S19   | 1:2:200:800                                                                                              | 35         | 77                                | 1.470                                                           |
| S20   | 1:2:200:800                                                                                              | 39         | 82                                | 1.715                                                           |
| S21   | 1:2:200:800                                                                                              | 44         | 86                                | 1.966                                                           |
| S22   | 1:2:200:800                                                                                              | 48         | 88                                | 2.120                                                           |
| S23   | 1:2:200:800                                                                                              | 52         | 90                                | 2.302                                                           |
| S24   | 1:2:200:800                                                                                              | 56         | 92                                | 2.526                                                           |
| S25   | 1:2:200:1000                                                                                             | 11         | 24                                | 0.274                                                           |

|     |              |    |    |       |
|-----|--------------|----|----|-------|
| S26 | 1:2:200:1000 | 16 | 42 | 0.545 |
| S27 | 1:2:200:1000 | 21 | 58 | 0.868 |
| S28 | 1:2:200:1000 | 24 | 66 | 1.079 |
| S29 | 1:2:200:1000 | 28 | 73 | 1.309 |
| S30 | 1:2:200:1000 | 32 | 79 | 1.561 |
| S31 | 1:2:200:1000 | 35 | 83 | 1.772 |
| S32 | 1:2:200:1000 | 39 | 86 | 1.966 |
| S33 | 1:2:200:1000 | 44 | 90 | 2.303 |
| S34 | 1:2:200:1000 | 49 | 92 | 2.526 |
| S35 | 1:2:200:1200 | 9  | 22 | 0.248 |
| S36 | 1:2:200:1200 | 13 | 41 | 0.528 |
| S37 | 1:2:200:1200 | 17 | 55 | 0.799 |
| S38 | 1:2:200:1200 | 21 | 66 | 1.079 |
| S39 | 1:2:200:1200 | 26 | 75 | 1.386 |
| S40 | 1:2:200:1200 | 31 | 82 | 1.715 |
| S41 | 1:2:200:1200 | 38 | 88 | 2.120 |
| S42 | 1:2:200:1200 | 46 | 92 | 2.526 |

Copolymerization conditions: 0.25 mmol *p*-QM, 0.5 mL THF-*d*<sup>8</sup>, rt. <sup>a</sup>All runs showed excellent copolymerization selectivity based on <sup>1</sup>H NMR determination. <sup>b</sup>Based on <sup>1</sup>H NMR analysis of the reaction mixture.

**Table S4.** Kinetic studies of *p*-QM/**1a** copolymerization at different **1a**-to-catalyst ratio

| Entry | [ <b>2d</b> ] <sub>0</sub> /[TBD] <sub>0</sub> /[ <i>p</i> - <b>QM</b> ] <sub>0</sub> /[ <b>1a</b> ] <sub>0</sub> | Observed rate coefficient, $k_{\text{obs}}$ (min <sup>-1</sup> ) <sup>a</sup> | ln( $k_{\text{obs}}$ ) | Concentrations [ <b>1a</b> ] (M) | ln[ <b>1a</b> ] |
|-------|-------------------------------------------------------------------------------------------------------------------|-------------------------------------------------------------------------------|------------------------|----------------------------------|-----------------|
| S1    | 1:2:200:600                                                                                                       | 0.064                                                                         | -2.742                 | 1.5                              | 0.405           |
| S2    | 1:2:200:800                                                                                                       | 0.053                                                                         | -2.936                 | 2                                | 0.693           |
| S3    | 1:2:200:1000                                                                                                      | 0.061                                                                         | -2.797                 | 2.5                              | 0.916           |
| S4    | 1:2:200:1200                                                                                                      | 0.062                                                                         | -2.781                 | 3                                | 1.099           |

<sup>a</sup>Calculated from the slope of the fitted regression line of Table S2.

**Table S5.** Kinetic studies of *p*-QM/**1a** copolymerization at different monomer-to-catalyst ratio<sup>a</sup>

| Entry | [ <b>2d</b> ] <sub>0</sub> /[TBD] <sub>0</sub> /[ <i>p</i> -QM] <sub>0</sub> /[ <b>1a</b> ] <sub>0</sub> | Time (min) | % <i>p</i> -QM Conv. <sup>b</sup> | $\ln([p\text{-QM}]_0/[p\text{-QM}]_t)$ |
|-------|----------------------------------------------------------------------------------------------------------|------------|-----------------------------------|----------------------------------------|
| S1    | 0.25:2:200:800                                                                                           | 5          | 13                                | 0.139                                  |
| S2    | 0.25:2:200:800                                                                                           | 9          | 28                                | 0.329                                  |
| S3    | 0.25:2:200:800                                                                                           | 14         | 66                                | 1.079                                  |
| S4    | 0.25:2:200:800                                                                                           | 24         | 77                                | 1.470                                  |
| S5    | 0.25:2:200:800                                                                                           | 28         | 84                                | 1.833                                  |
| S6    | 0.25:2:200:800                                                                                           | 32         | 89                                | 2.207                                  |
| S7    | 0.25:2:200:800                                                                                           | 36         | 91                                | 2.408                                  |
| S8    | 0.25:2:200:800                                                                                           | 39         | 93                                | 2.659                                  |
| S9    | 0.25:2:200:800                                                                                           | 43         | 94                                | 2.813                                  |
| S10   | 0.25:2:200:800                                                                                           | 50         | 96                                | 3.219                                  |
| S11   | 0.5:2:200:800                                                                                            | 12         | 37                                | 0.462                                  |
| S12   | 0.5:2:200:800                                                                                            | 19         | 56                                | 0.821                                  |
| S13   | 0.5:2:200:800                                                                                            | 25         | 72                                | 1.273                                  |
| S14   | 0.5:2:200:800                                                                                            | 29         | 80                                | 1.609                                  |
| S15   | 0.5:2:200:800                                                                                            | 33         | 85                                | 1.897                                  |
| S16   | 0.5:2:200:800                                                                                            | 38         | 91                                | 2.408                                  |
| S17   | 0.5:2:200:800                                                                                            | 42         | 92                                | 2.526                                  |
| S18   | 0.5:2:200:800                                                                                            | 52         | 95                                | 2.996                                  |
| S19   | 1:2:200:800                                                                                              | 12         | 21                                | 0.236                                  |
| S20   | 1:2:200:800                                                                                              | 16         | 34                                | 0.416                                  |
| S21   | 1:2:200:800                                                                                              | 20         | 45                                | 0.598                                  |
| S22   | 1:2:200:800                                                                                              | 23         | 55                                | 0.799                                  |
| S23   | 1:2:200:800                                                                                              | 27         | 62                                | 0.968                                  |
| S24   | 1:2:200:800                                                                                              | 30         | 71                                | 1.238                                  |
| S25   | 1:2:200:800                                                                                              | 35         | 77                                | 1.470                                  |
| S26   | 1:2:200:800                                                                                              | 39         | 82                                | 1.715                                  |

|     |             |     |    |       |
|-----|-------------|-----|----|-------|
| S27 | 1:2:200:800 | 44  | 86 | 1.966 |
| S28 | 1:2:200:800 | 48  | 88 | 2.120 |
| S29 | 1:2:200:800 | 52  | 90 | 2.303 |
| S30 | 1:2:200:800 | 56  | 92 | 2.526 |
| S31 | 2:2:200:800 | 32  | 3  | 0.030 |
| S32 | 2:2:200:800 | 39  | 5  | 0.051 |
| S33 | 2:2:200:800 | 44  | 6  | 0.062 |
| S34 | 2:2:200:800 | 54  | 14 | 0.151 |
| S35 | 2:2:200:800 | 58  | 21 | 0.236 |
| S36 | 2:2:200:800 | 62  | 28 | 0.329 |
| S37 | 2:2:200:800 | 66  | 41 | 0.528 |
| S38 | 2:2:200:800 | 70  | 51 | 0.713 |
| S39 | 2:2:200:800 | 74  | 61 | 0.942 |
| S40 | 2:2:200:800 | 77  | 70 | 1.204 |
| S41 | 2:2:200:800 | 82  | 76 | 1.427 |
| S42 | 2:2:200:800 | 85  | 83 | 1.772 |
| S43 | 2:2:200:800 | 89  | 86 | 1.966 |
| S44 | 2:2:200:800 | 93  | 89 | 2.207 |
| S45 | 2:2:200:800 | 97  | 92 | 2.526 |
| S46 | 2:2:200:800 | 101 | 93 | 2.659 |
| S47 | 2:2:200:800 | 105 | 93 | 2.659 |
| S48 | 2:2:200:800 | 108 | 94 | 2.813 |
| S49 | 2:2:200:800 | 112 | 95 | 2.995 |
| S50 | 2:2:200:800 | 116 | 95 | 2.995 |

Copolymerization conditions: 0.25 mmol *p*-QM, 0.5 mL THF-*d*<sup>8</sup>, rt. <sup>a</sup>All runs showed excellent copolymerization selectivity based on <sup>1</sup>H NMR determination. <sup>b</sup>Based on <sup>1</sup>H NMR analysis of the reaction mixture.

**Table S6.** Kinetic studies of *p*-QM/1a copolymerization at different monomer-to-catalyst ratio

| Entry | [2d] <sub>0</sub> /[TBD] <sub>0</sub> /[ <i>p</i> -QM] <sub>0</sub> /[1a] <sub>0</sub> | Observed rate coefficient, <i>k</i> <sub>obs</sub> (min <sup>-1</sup> ) <sup>a</sup> | ln( <i>k</i> <sub>obs</sub> ) | Concentrations [2d] (M) | ln[2d] |
|-------|----------------------------------------------------------------------------------------|--------------------------------------------------------------------------------------|-------------------------------|-------------------------|--------|
| S1    | 0.25:2:200:800                                                                         | 0.070                                                                                | -2.666                        | 6.25 × 10 <sup>-4</sup> | -7.378 |
| S2    | 0.5:2:200:800                                                                          | 0.068                                                                                | -2.694                        | 1.25 × 10 <sup>-3</sup> | -6.685 |
| S3    | 1:2:200:800                                                                            | 0.053                                                                                | -2.936                        | 2.5 × 10 <sup>-3</sup>  | -5.991 |
| S4    | 2:2:200:800                                                                            | 0.043                                                                                | -3.135                        | 5 × 10 <sup>-3</sup>    | -5.298 |

<sup>a</sup>Calculated from the slope of the fitted regression line of Table S4.**Table S7.** Kinetic studies of *p*-QM/1a copolymerization at different monomer-to-initiator ratio<sup>a</sup>

| Entry | [2d] <sub>0</sub> /[TBD] <sub>0</sub> /[ <i>p</i> -QM] <sub>0</sub> /[1a] <sub>0</sub> | Time (min) | % <i>p</i> -QM Conv. <sup>b</sup> | ln([ <i>p</i> -QM] <sub>0</sub> /[ <i>p</i> -QM] <sub>t</sub> ) |
|-------|----------------------------------------------------------------------------------------|------------|-----------------------------------|-----------------------------------------------------------------|
| S1    | 1:1.2:200:800                                                                          | 28         | 40                                | 0.511                                                           |
| S2    | 1:1.2:200:800                                                                          | 34         | 59                                | 0.892                                                           |
| S3    | 1:1.2:200:800                                                                          | 40         | 70                                | 1.204                                                           |
| S4    | 1:1.2:200:800                                                                          | 44         | 76                                | 1.427                                                           |
| S5    | 1:1.2:200:800                                                                          | 50         | 80                                | 1.609                                                           |
| S6    | 1:1.2:200:800                                                                          | 55         | 85                                | 1.897                                                           |
| S7    | 1:1.2:200:800                                                                          | 60         | 86                                | 1.966                                                           |
| S8    | 1:1.2:200:800                                                                          | 65         | 87                                | 2.040                                                           |
| S9    | 1:1.2:200:800                                                                          | 71         | 89                                | 2.207                                                           |
| S10   | 1:1.2:200:800                                                                          | 76         | 90                                | 2.303                                                           |
| S11   | 1:1.2:200:800                                                                          | 85         | 92                                | 2.526                                                           |
| S12   | 1:1.2:200:800                                                                          | 92         | 93                                | 2.659                                                           |
| S13   | 1:1.5:200:800                                                                          | 16         | 13                                | 0.139                                                           |
| S14   | 1:1.5:200:800                                                                          | 20         | 28                                | 0.329                                                           |
| S15   | 1:1.5:200:800                                                                          | 25         | 42                                | 0.545                                                           |
| S16   | 1:1.5:200:800                                                                          | 29         | 51                                | 0.713                                                           |



|     |               |    |    |       |
|-----|---------------|----|----|-------|
| S17 | 1:1.5:200:800 | 33 | 59 | 0.892 |
| S18 | 1:1.5:200:800 | 36 | 64 | 1.022 |
| S19 | 1:1.5:200:800 | 40 | 69 | 1.171 |
| S20 | 1:1.5:200:800 | 44 | 74 | 1.347 |
| S21 | 1:1.5:200:800 | 49 | 78 | 1.514 |
| S22 | 1:1.5:200:800 | 57 | 84 | 1.833 |
| S23 | 1:2:200:800   | 12 | 21 | 0.236 |
| S24 | 1:2:200:800   | 16 | 34 | 0.416 |
| S25 | 1:2:200:800   | 20 | 45 | 0.598 |
| S26 | 1:2:200:800   | 23 | 55 | 0.799 |
| S27 | 1:2:200:800   | 27 | 62 | 0.968 |
| S28 | 1:2:200:800   | 30 | 71 | 1.238 |
| S29 | 1:2:200:800   | 35 | 77 | 1.470 |
| S30 | 1:2:200:800   | 39 | 82 | 1.715 |
| S31 | 1:2:200:800   | 44 | 86 | 1.966 |
| S32 | 1:2:200:800   | 48 | 88 | 2.120 |
| S33 | 1:2:200:800   | 52 | 90 | 2.302 |
| S34 | 1:2:200:800   | 56 | 92 | 2.526 |
| S35 | 1:2.5:200:800 | 8  | 15 | 0.163 |
| S36 | 1:2.5:200:800 | 12 | 33 | 0.400 |
| S37 | 1:2.5:200:800 | 16 | 50 | 0.693 |
| S38 | 1:2.5:200:800 | 21 | 68 | 1.139 |
| S39 | 1:2.5:200:800 | 26 | 80 | 1.609 |
| S40 | 1:2.5:200:800 | 31 | 86 | 1.966 |
| S41 | 1:2.5:200:800 | 36 | 91 | 2.408 |

Copolymerization conditions: 0.25 mmol *p*-QM, 0.5 mL THF-*d*<sup>8</sup>, rt. <sup>a</sup>All runs showed excellent copolymerization selectivity based on <sup>1</sup>H NMR determination. <sup>b</sup>Based on <sup>1</sup>H NMR analysis of the reaction mixture.

**Table S8.** Kinetic studies of *p*-QM/**1a** copolymerization at different monomer-to-initiator ratio

| Entry | $[2\mathbf{d}]_0/[\text{TBD}]_0/[p\text{-QM}]_0/[\mathbf{1a}]_0$ | Observed rate coefficient, $k_{\text{obs}}$ ( $\text{min}^{-1}$ ) <sup>a</sup> | $\ln(k_{\text{obs}})$ | Concentrations $[\text{TBD}]$ (M) <sup>b</sup> | $\ln[\text{TBD}]$ |
|-------|------------------------------------------------------------------|--------------------------------------------------------------------------------|-----------------------|------------------------------------------------|-------------------|
| S1    | 1:1.2:200:800                                                    | 0.032                                                                          | -3.449                | $3 \times 10^{-3}$                             | -5.809            |
| S2    | 1:1.5:200:800                                                    | 0.041                                                                          | -3.189                | $3.75 \times 10^{-3}$                          | -5.586            |
| S3    | 1:2:200:800                                                      | 0.053                                                                          | -2.936                | $5 \times 10^{-3}$                             | -5.298            |
| S4    | 1:2.5:200:800                                                    | 0.082                                                                          | -2.507                | $6.25 \times 10^{-3}$                          | -5.075            |

<sup>a</sup>Calculated from the slope of the fitted regression line of Table S6.

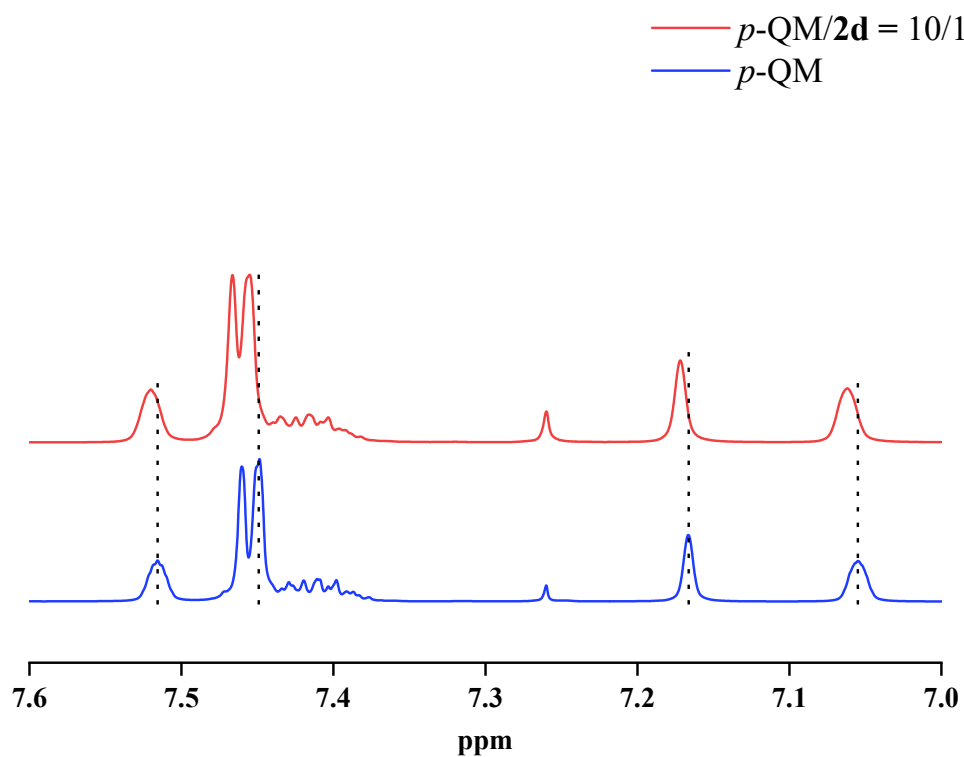

**Figure S12.** <sup>1</sup>H NMR studies of *p*-QM activated by **2c**.

**Table S9.** Studies of *p*-QM/**1a** copolymerization catalyzed by different acids at fixed *p*-QM-to-catalyst ratio ( $[\text{acid}]_0/[\text{TBD}]_0/[p\text{-QM}]_0/[\mathbf{1a}]_0 = 1:1:100:400$ )

| entry | acid                            | time (h) | conv. (%) | $M_{n,\text{theo}}$ (kDa) | $M_{n,\text{GPC}}$ (kDa) | PDI  |
|-------|---------------------------------|----------|-----------|---------------------------|--------------------------|------|
| 1     | <chem>c1ccc(cc1)C(=O)O</chem>   | 0.8      | 86        | 41.5                      | 51.0                     | 1.48 |
| 2     | <chem>COc1ccc(cc1)C(=O)O</chem> | 0.8      | 91        | 43.9                      | 54.7                     | 1.41 |

|   |                                                                                   |     |    |      |      |      |
|---|-----------------------------------------------------------------------------------|-----|----|------|------|------|
| 3 | 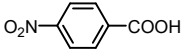 | 0.8 | 87 | 42.0 | 44.7 | 1.49 |
| 4 |  | 0.8 | 89 | 43.0 | 53.0 | 1.44 |
| 5 |  | 19  | 58 | 28.1 | 28.6 | 1.40 |
| 6 |  | 0.5 | 99 | 47.8 | 45.5 | 1.55 |
| 7 |  | 1   | 99 | 47.8 | 33.1 | 1.49 |
| 8 | HCOOH                                                                             | 4   | 99 | 47.8 | 27.8 | 1.44 |

Copolymerization conditions: *p*-QM (52.5 mg, 0.25 mmol), isothiocyanate **1a** (182  $\mu$ L, 271 mg, 1.0 mmol), TBD (0.0025 mmol), acid (0.0025 mmol), 0.5 mL THF, rt.

### Thermal Properties of Polythioimidocarbonates

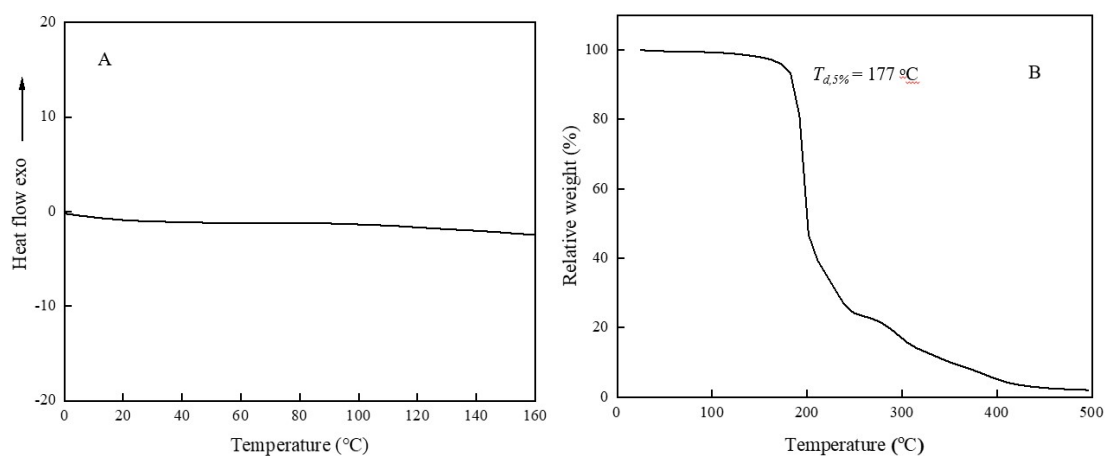

**Figure S13.** DSC (A) and TGA (B) curves of P(*p*-QM-alt-**1a**).

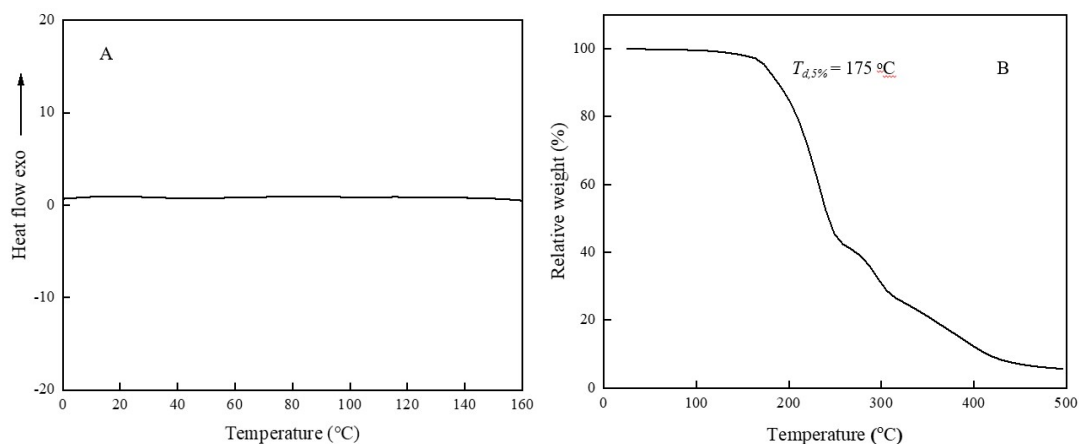

**Figure S14.** DSC (A) and TGA (B) curves of P(*p*-QM-alt-**1b**).

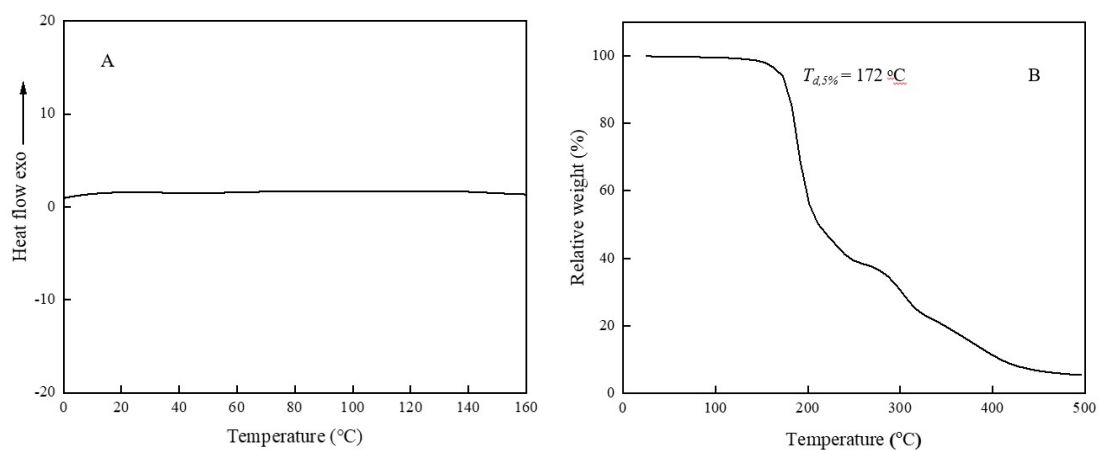

**Figure S15.** DSC (A) and TGA (B) curves of P(*p*-QM-alt-1c).

### Bulk Thermal Depolymerization of P(*p*-QM-alt-1a) and Monomers Recovery

Thermal depolymerization of P(*p*-QM-alt-1a) and recovery of monomers were carried out on the following experimental set-up. P(*p*-QM-alt-1a) (100 mg) were added into a sublimation device and kept at 190 °C with stirring in vacuo for 2 minutes. When the coldfinger was fully covered with yellow sublimate, the reaction was stopped. Then the sublimate was collected, weighted, and characterized by NMR.

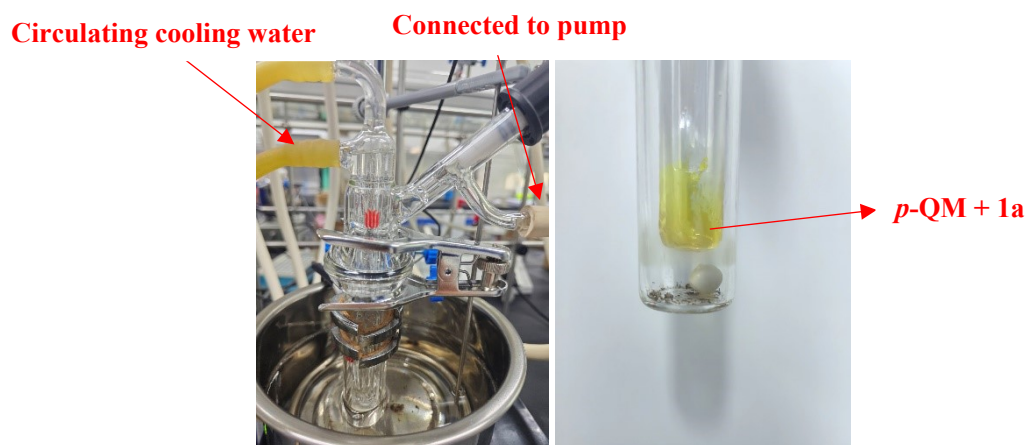

**Figure S16.** Thermal depolymerization of P(*p*-QM-alt-1a) and recovery of monomers via sublimation.

## DFT Study

### Computational Methods

The potential energy surface (PES) calculations were performed using Gaussian 16 C.02<sup>2</sup> and ORCA 6.0.1<sup>3</sup> software packages. Geometry optimization and harmonic frequency calculations were carried out with Gaussian 16 C.02 using the B3LYP<sup>4</sup> functional, def2-SVP<sup>5</sup> basis set, and the D3BJ<sup>6</sup> empirical dispersion correction. Transition states were verified by frequency analysis, ensuring the presence of a single imaginary frequency corresponding to the reaction coordinate, while all stable states exhibited no imaginary frequencies. Intrinsic reaction coordinate (IRC)<sup>7</sup> calculations were conducted to confirm the connectivity of each transition state to its corresponding reactants and products. Single-point energy calculations in THF solution were performed using ORCA 6.0.1 with the PWPB95<sup>8</sup> functional, def2-TZVPPD<sup>9</sup> basis set, and the D4<sup>10</sup> empirical dispersion correction. Solvent effects were modeled with the SMD<sup>11</sup> implicit solvation model for THF. The Gibbs free energy in THF solution was obtained by combining the following components: Gibbs free energy corrections from Gaussian 16 frequency analysis, single-point electronic energies from ORCA calculations in solution, and a correction for the gas-phase to solution free energy change (1.89 kcal/mol).

### Molecular Coordinates

#### *p*-QM

Charge: 0 Multiplicity: 1

|   |             |             |             |
|---|-------------|-------------|-------------|
| C | -3.12794100 | -1.22982800 | 0.80034500  |
| C | -1.90051800 | -0.93069300 | 1.58218100  |
| C | -0.67730600 | -1.06337000 | 1.00969200  |
| C | -0.50727500 | -1.49051300 | -0.37001800 |
| C | -1.71613900 | -1.70899900 | -1.15077800 |
| C | -2.96161500 | -1.60840900 | -0.62436400 |
| H | 0.21122700  | -0.80113100 | 1.58521100  |
| H | -1.59087400 | -1.99464100 | -2.19997200 |

|   |             |             |             |
|---|-------------|-------------|-------------|
| C | -2.10927900 | -0.46678500 | 2.99078300  |
| H | -2.72775800 | 0.44522300  | 3.01062700  |
| H | -2.67212600 | -1.22095400 | 3.56420700  |
| H | -1.15477500 | -0.26536700 | 3.49762700  |
| C | -4.21874300 | -1.86180500 | -1.39823900 |
| H | -4.80388300 | -2.66993900 | -0.93024200 |
| H | -4.86949700 | -0.97258600 | -1.38018700 |
| H | -4.00532100 | -2.13077700 | -2.44260400 |
| C | 0.70791700  | -1.66885400 | -0.98142600 |
| H | 0.67606700  | -1.85538200 | -2.06087300 |
| C | 2.05368600  | -1.62573100 | -0.41699900 |
| C | 3.11729700  | -1.20034100 | -1.24272300 |
| C | 2.36111300  | -2.03578200 | 0.89867000  |
| C | 4.42212800  | -1.13352500 | -0.75981900 |
| H | 2.90312900  | -0.90419500 | -2.27283300 |
| C | 3.66945900  | -1.97780200 | 1.37660400  |
| H | 1.57465000  | -2.44290800 | 1.53418200  |
| C | 4.70336800  | -1.51681800 | 0.55566200  |
| H | 5.22609000  | -0.78674700 | -1.41325800 |
| H | 3.88666200  | -2.30866200 | 2.39497900  |
| H | 5.72719200  | -1.47271600 | 0.93409500  |
| O | -4.24175600 | -1.14137400 | 1.31032100  |

**TBD**

Charge: 0 Multiplicity: 1

|   |             |            |             |
|---|-------------|------------|-------------|
| C | -1.41530800 | 1.94786700 | -2.22758400 |
| C | -1.42556400 | 2.93406600 | -1.06765700 |
| C | 0.38326100  | 1.56671500 | -0.18518300 |
| C | 0.02891100  | 1.53626700 | -2.52081200 |
| H | -0.95850400 | 3.89344700 | -1.37817000 |
| H | -2.45766400 | 3.17063700 | -0.75818900 |
| H | -2.00548700 | 1.05992800 | -1.94474000 |
| H | -1.89317500 | 2.39605300 | -3.11354100 |
| H | 0.54828600  | 2.36739900 | -3.04053600 |
| H | 0.04038400  | 0.69398300 | -3.23555200 |
| C | -0.86286100 | 3.09848800 | 1.32364100  |
| C | -0.31837900 | 2.29960300 | 2.49968400  |
| C | 1.09909900  | 1.84598300 | 2.17971800  |
| H | -0.33497700 | 2.91591000 | 3.41180200  |
| H | -0.33751200 | 4.07738500 | 1.26449200  |
| H | -1.93103200 | 3.32839100 | 1.47553100  |
| H | 1.76932900  | 2.73278800 | 2.14473500  |
| H | 1.48461000  | 1.18495000 | 2.97209800  |
| H | -0.95268100 | 1.41480700 | 2.67027400  |
| N | -0.73200900 | 2.36461900 | 0.07605600  |
| N | 0.77472200  | 1.16211300 | -1.34050100 |
| N | 1.07600100  | 1.11452700 | 0.93095500  |
| H | 1.92453600  | 0.63584500 | 0.64980200  |

***m*-phthalic acid**

Charge: 0 Multiplicity: 1

|   |             |             |             |
|---|-------------|-------------|-------------|
| C | -3.06624000 | 0.62850900  | -0.06663000 |
| C | -1.66890000 | 0.58766300  | -0.03636100 |
| C | -0.93936000 | 1.77140800  | 0.12864700  |
| C | -1.61071400 | 2.99614300  | 0.26330600  |
| C | -3.00658900 | 3.03427400  | 0.23280000  |
| C | -3.73367500 | 1.85610700  | 0.06853800  |
| H | -1.13363500 | -0.35575100 | -0.13964600 |
| H | -1.03220500 | 3.91149200  | 0.39125200  |
| H | -3.52808700 | 3.98799600  | 0.33772200  |
| H | -4.82474200 | 1.85942800  | 0.04141900  |
| C | 0.54796200  | 1.67553100  | 0.15428300  |
| C | -3.89020700 | -0.60200200 | -0.23977100 |
| O | -5.09836900 | -0.61790900 | -0.27227100 |
| O | 1.17206900  | 0.64706300  | 0.04255700  |
| O | 1.14889800  | 2.87267400  | 0.31775300  |
| H | 2.10569100  | 2.70224500  | 0.32063600  |
| O | -3.14634600 | -1.71920700 | -0.35930100 |
| H | -3.76926600 | -2.45734300 | -0.46660900 |

## PHO

Charge: -1 Multiplicity: 1

|   |             |             |             |
|---|-------------|-------------|-------------|
| C | 1.11403500  | -2.93314100 | -0.52187300 |
| C | -0.17693900 | -2.41359800 | -0.46682300 |
| C | -0.54070400 | -1.22040600 | -1.20928200 |



|   |             |             |             |
|---|-------------|-------------|-------------|
| C | 0.53058000  | -0.62573500 | -1.98843600 |
| C | 1.80537400  | -1.18541300 | -2.00914000 |
| C | 2.13977600  | -2.34686800 | -1.28706000 |
| H | 1.34115600  | -3.83932800 | 0.05874400  |
| H | 2.58372000  | -0.69778600 | -2.61440000 |
| O | -1.70576500 | -0.72809100 | -1.17295400 |
| C | -1.26579300 | -3.03681500 | 0.35946700  |
| H | -1.66872900 | -2.31538000 | 1.09462300  |
| H | -2.13346300 | -3.31086500 | -0.26913500 |
| H | -0.91773500 | -3.93608200 | 0.89715400  |
| C | 0.18055800  | 0.61951000  | -2.75233900 |
| H | -0.65184400 | 0.43245200  | -3.45603000 |
| H | -0.19687600 | 1.40789200  | -2.07471200 |
| H | 1.04158200  | 1.01750000  | -3.31728000 |
| C | 3.51496400  | -2.96154200 | -1.37135600 |
| H | 4.29984200  | -2.19477800 | -1.50425900 |
| H | 3.76482500  | -3.52730300 | -0.45586800 |
| H | 3.63083100  | -3.67256000 | -2.21734300 |

### NCS

Charge: 0 Multiplicity: 1

|   |            |             |            |
|---|------------|-------------|------------|
| C | 3.77621800 | 0.27100000  | 0.05453700 |
| C | 3.33843600 | -0.99848900 | 0.43772700 |
| C | 2.20139900 | -1.15277700 | 1.23086600 |
| C | 1.49051800 | -0.01972900 | 1.65436400 |

|   |             |             |             |
|---|-------------|-------------|-------------|
| C | 1.92753200  | 1.26258800  | 1.27609000  |
| C | 3.06532600  | 1.39606100  | 0.48305700  |
| H | 4.65411500  | 0.38271900  | -0.58138600 |
| H | 1.85083400  | -2.14318200 | 1.52037500  |
| H | 1.36949600  | 2.14208600  | 1.59789100  |
| N | 0.36599700  | -0.17873200 | 2.43004800  |
| C | -0.56296000 | 0.27866900  | 3.03868800  |
| S | -1.80735800 | 0.78782600  | 3.85990400  |
| C | 4.12990500  | -2.21827200 | 0.02775100  |
| C | 3.56643700  | 2.77337700  | 0.11628100  |
| F | 4.11241700  | 2.78697400  | -1.10985700 |
| F | 4.51194100  | 3.18960400  | 0.97664900  |
| F | 2.57991600  | 3.68345900  | 0.13720800  |
| F | 5.06789600  | -2.51731300 | 0.94349700  |
| F | 3.34306500  | -3.29830400 | -0.10171900 |
| F | 4.76154100  | -2.02735700 | -1.14089000 |

### INT1

Charge: 0 Multiplicity: 1

|   |             |            |             |
|---|-------------|------------|-------------|
| C | -0.68261700 | 2.69967100 | -0.30172200 |
| C | -1.80272600 | 2.53134400 | 0.63467600  |
| C | -2.84921500 | 1.72595100 | 0.30487600  |
| C | -2.91966000 | 1.04222600 | -0.96739800 |
| C | -1.83082000 | 1.25513800 | -1.89438900 |
| C | -0.75491300 | 2.03726000 | -1.61038800 |

|   |             |             |             |
|---|-------------|-------------|-------------|
| H | -3.63557100 | 1.54659400  | 1.03827400  |
| H | -1.89153200 | 0.75062700  | -2.86272200 |
| C | -1.67951800 | 3.21570000  | 1.96312600  |
| H | -0.77475300 | 2.87566200  | 2.49272400  |
| H | -1.56117200 | 4.30330300  | 1.83332600  |
| H | -2.55763700 | 3.02363000  | 2.59629500  |
| C | 0.38634000  | 2.22545600  | -2.56488200 |
| H | 0.72445300  | 3.27236100  | -2.57855800 |
| H | 1.24289700  | 1.60932800  | -2.25023800 |
| H | 0.10429600  | 1.92592800  | -3.58443500 |
| C | -3.88684000 | 0.12091400  | -1.28757400 |
| H | -3.73714000 | -0.44794000 | -2.20789700 |
| C | -5.08809100 | -0.21419800 | -0.52323400 |
| C | -5.48257700 | -1.56555400 | -0.41933500 |
| C | -5.89073500 | 0.77235300  | 0.08510600  |
| C | -6.62222700 | -1.91519000 | 0.30287100  |
| H | -4.83319600 | -2.32457800 | -0.86007200 |
| C | -7.03791000 | 0.41665400  | 0.79552300  |
| H | -5.63111700 | 1.82528300  | -0.03507300 |
| C | -7.40362300 | -0.92727200 | 0.91345700  |
| H | -6.90444400 | -2.96710500 | 0.39154000  |
| H | -7.65485500 | 1.19452500  | 1.25166900  |
| H | -8.30048900 | -1.20413300 | 1.47272700  |
| O | 0.30299800  | 3.38343000  | 0.04167200  |

|   |             |             |             |
|---|-------------|-------------|-------------|
| C | -0.20000900 | -2.08208700 | -2.12478700 |
| C | 0.55646500  | -2.21224100 | -0.81115800 |
| C | -1.63771400 | -1.82615400 | 0.20286400  |
| C | -1.58238700 | -2.72205800 | -1.98222800 |
| H | 0.85542900  | -3.26794900 | -0.64410000 |
| H | 1.47189700  | -1.60301400 | -0.82923900 |
| H | -0.30783000 | -1.01177200 | -2.36080300 |
| H | 0.37493300  | -2.54824400 | -2.94084800 |
| H | -1.47249200 | -3.82640700 | -1.96051000 |
| H | -2.18676100 | -2.50976100 | -2.88416300 |
| C | 0.39759000  | -1.45641400 | 1.55243500  |
| C | -0.37750900 | -0.40153700 | 2.32515700  |
| C | -1.80944000 | -0.87482600 | 2.53281600  |
| H | 0.10088900  | -0.20433400 | 3.29661300  |
| H | 0.50233800  | -2.38175500 | 2.15808900  |
| H | 1.40382200  | -1.08440600 | 1.32312100  |
| H | -1.82749100 | -1.66352000 | 3.31337800  |
| H | -2.43730200 | -0.04657100 | 2.90292000  |
| H | -0.36366800 | 0.52982400  | 1.74145300  |
| N | -0.26571100 | -1.73183600 | 0.28803800  |
| N | -2.30848100 | -2.26792800 | -0.81693700 |
| N | -2.35326400 | -1.35658200 | 1.28224300  |
| H | -3.34930500 | -1.51506600 | 1.20315800  |
| C | 5.43549500  | 1.99797200  | 0.06989400  |

|   |            |             |             |
|---|------------|-------------|-------------|
| C | 4.38497100 | 1.06891500  | 0.04446300  |
| C | 4.66694300 | -0.29974700 | 0.11557300  |
| C | 5.99144800 | -0.73948000 | 0.21254200  |
| C | 7.03863600 | 0.19518300  | 0.23818000  |
| C | 6.75845100 | 1.55901300  | 0.16687200  |
| H | 5.20030700 | 3.06128700  | 0.01372400  |
| H | 3.84659300 | -1.01568400 | 0.09391200  |
| H | 8.06317600 | -0.17312900 | 0.31436900  |
| H | 7.57372400 | 2.28552000  | 0.18703500  |
| C | 2.95425900 | 1.50236300  | -0.05709900 |
| C | 6.33819600 | -2.18569000 | 0.29038700  |
| O | 2.03000500 | 0.70397000  | -0.06135900 |
| O | 7.46301300 | -2.62064300 | 0.37512900  |
| O | 2.80244300 | 2.80857800  | -0.14932400 |
| H | 1.81729400 | 3.04588200  | -0.15833800 |
| O | 5.25479300 | -2.99044700 | 0.25723100  |
| H | 5.58930200 | -3.90105400 | 0.31271400  |

### TS1

Charge: 0 Multiplicity: 1

|   |             |            |             |
|---|-------------|------------|-------------|
| C | -0.64559700 | 2.82406400 | 0.05646400  |
| C | -1.72389400 | 2.40141400 | 0.92769400  |
| C | -2.67682400 | 1.52568000 | 0.46409000  |
| C | -2.67421500 | 1.03823200 | -0.87790200 |
| C | -1.68044100 | 1.56309100 | -1.75779500 |

|   |             |             |             |
|---|-------------|-------------|-------------|
| C | -0.69780600 | 2.42702900  | -1.33956800 |
| H | -3.43871000 | 1.16668900  | 1.15797200  |
| H | -1.70031300 | 1.24422000  | -2.80536900 |
| C | -1.68906500 | 2.89358700  | 2.34550300  |
| H | -0.76678000 | 2.56169400  | 2.85106600  |
| H | -1.66531300 | 3.99467300  | 2.37945000  |
| H | -2.55906700 | 2.53945800  | 2.91929500  |
| C | 0.34574600  | 2.97339400  | -2.27218200 |
| H | 0.44732200  | 4.06321000  | -2.14656700 |
| H | 1.34112600  | 2.55050600  | -2.06255400 |
| H | 0.09585900  | 2.75769900  | -3.32161500 |
| C | -3.43625700 | -0.08409300 | -1.29139200 |
| H | -3.38300100 | -0.31065300 | -2.36099400 |
| C | -4.73416300 | -0.46526000 | -0.66015500 |
| C | -5.16749500 | -1.80296100 | -0.59296300 |
| C | -5.60894300 | 0.54070300  | -0.20665700 |
| C | -6.41886800 | -2.12397300 | -0.06603500 |
| H | -4.48842600 | -2.58393000 | -0.93551100 |
| C | -6.86214400 | 0.21708400  | 0.31854500  |
| H | -5.30782900 | 1.58558000  | -0.28701100 |
| C | -7.27087700 | -1.11596000 | 0.39621300  |
| H | -6.73074100 | -3.17005100 | -0.01509300 |
| H | -7.52320600 | 1.01518000  | 0.66471000  |
| H | -8.24972200 | -1.36889800 | 0.81041800  |

|   |             |             |             |
|---|-------------|-------------|-------------|
| O | 0.30163200  | 3.52793500  | 0.52199200  |
| C | -0.04333600 | -1.50220600 | -2.11320200 |
| C | 0.63328300  | -1.97538400 | -0.83852700 |
| C | -1.58788200 | -1.65694500 | 0.17453400  |
| C | -1.46585800 | -2.05447700 | -2.16983700 |
| H | 0.92350500  | -3.04060500 | -0.91767600 |
| H | 1.53870600  | -1.38344500 | -0.65202700 |
| H | -0.07532300 | -0.40340200 | -2.10716600 |
| H | 0.54321100  | -1.82304700 | -2.98781400 |
| H | -1.43931800 | -3.15306200 | -2.30791200 |
| H | -1.99999500 | -1.65427900 | -3.04769400 |
| C | 0.36217900  | -1.74804300 | 1.64178500  |
| C | -0.32863200 | -0.67962500 | 2.47591900  |
| C | -1.80991800 | -1.00784300 | 2.58767200  |
| H | 0.12023500  | -0.61782700 | 3.47821700  |
| H | 0.30413500  | -2.74024000 | 2.13025300  |
| H | 1.41757000  | -1.48744600 | 1.50649700  |
| H | -1.97069900 | -1.81085900 | 3.33050300  |
| H | -2.37289400 | -0.12578600 | 2.93204300  |
| H | -0.17765900 | 0.28575700  | 1.97211300  |
| N | -0.24582400 | -1.79459100 | 0.31398400  |
| N | -2.23335100 | -1.72954400 | -0.98135900 |
| N | -2.32558400 | -1.42852200 | 1.29339300  |
| H | -3.32531600 | -1.39825900 | 1.13569800  |

|   |            |             |             |
|---|------------|-------------|-------------|
| C | 5.22940700 | 1.87246600  | -0.17765100 |
| C | 4.16765500 | 0.99206000  | 0.07670900  |
| C | 4.42056800 | -0.37933700 | 0.18018900  |
| C | 5.72106500 | -0.87223200 | 0.02566400  |
| C | 6.77836400 | 0.01485000  | -0.23102500 |
| C | 6.52940700 | 1.38287600  | -0.33128000 |
| H | 5.01742300 | 2.93946800  | -0.25320900 |
| H | 3.59668600 | -1.06107400 | 0.38211800  |
| H | 7.78430700 | -0.39210000 | -0.34749900 |
| H | 7.35176900 | 2.07371100  | -0.53014900 |
| C | 2.75696600 | 1.48932300  | 0.24057900  |
| C | 6.02816500 | -2.32468700 | 0.12417000  |
| O | 1.82666400 | 0.71522400  | 0.43088700  |
| O | 7.12973100 | -2.80855600 | 0.00561400  |
| O | 2.64757400 | 2.78868200  | 0.14237200  |
| H | 1.65553600 | 3.11566700  | 0.26802600  |
| O | 4.93413500 | -3.08278700 | 0.36379800  |
| H | 5.24880700 | -4.00088400 | 0.41068200  |

## INT2

Charge: 0 Multiplicity: 1

|   |             |            |             |
|---|-------------|------------|-------------|
| C | -0.71629400 | 3.04200700 | 0.50603000  |
| C | -1.58136300 | 2.33429700 | 1.36959500  |
| C | -2.47320400 | 1.40924300 | 0.82655500  |
| C | -2.54363700 | 1.18288400 | -0.55497900 |



|   |             |             |             |
|---|-------------|-------------|-------------|
| C | -1.78002000 | 2.00432400  | -1.39824700 |
| C | -0.87094600 | 2.93353300  | -0.89808800 |
| H | -3.09595300 | 0.82917400  | 1.51123800  |
| H | -1.86633300 | 1.88544700  | -2.48359600 |
| C | -1.42493600 | 2.51852500  | 2.85296800  |
| H | -0.41027700 | 2.22255500  | 3.16699300  |
| H | -1.53389600 | 3.57597800  | 3.14118000  |
| H | -2.16267300 | 1.92473300  | 3.41490700  |
| C | -0.02097200 | 3.78192200  | -1.80259000 |
| H | -0.07634300 | 4.84189400  | -1.50563500 |
| H | 1.04009900  | 3.49759100  | -1.72253500 |
| H | -0.33939100 | 3.69194600  | -2.85209100 |
| C | -3.15009900 | -0.06702000 | -1.15592800 |
| H | -3.41897800 | 0.16237300  | -2.19770500 |
| C | -4.41536100 | -0.61894400 | -0.51081900 |
| C | -4.70676400 | -1.99184300 | -0.52913200 |
| C | -5.36412700 | 0.26154900  | 0.03290200  |
| C | -5.90473700 | -2.47643200 | 0.00378800  |
| H | -3.98489000 | -2.68554900 | -0.96448600 |
| C | -6.56313600 | -0.22193800 | 0.56003400  |
| H | -5.15478600 | 1.33206400  | 0.04260400  |
| C | -6.83643400 | -1.59288700 | 0.55284100  |
| H | -6.11044700 | -3.54935000 | -0.01527900 |
| H | -7.28763400 | 0.47857700  | 0.98190100  |

|   |             |             |             |
|---|-------------|-------------|-------------|
| H | -7.77238800 | -1.96987400 | 0.97137600  |
| O | 0.23066000  | 3.81451700  | 1.04111700  |
| C | 0.00539500  | -0.72291300 | -2.54316100 |
| C | 0.78066300  | -1.54356000 | -1.52969100 |
| C | -1.33497700 | -1.50252500 | -0.23999200 |
| C | -1.42439400 | -1.24610400 | -2.61967000 |
| H | 1.16062300  | -2.48122900 | -1.96998200 |
| H | 1.61967600  | -0.95115900 | -1.14114900 |
| H | -0.01078100 | 0.32606000  | -2.21605400 |
| H | 0.50061400  | -0.77501400 | -3.52395400 |
| H | -1.43650100 | -2.30628900 | -2.92956800 |
| H | -2.02313700 | -0.68635300 | -3.34750900 |
| C | 0.61137400  | -2.43911700 | 0.80691400  |
| C | 0.33487700  | -1.51555700 | 1.98827400  |
| C | -1.16682500 | -1.50501300 | 2.24571700  |
| H | 0.86884200  | -1.85269800 | 2.88863000  |
| H | 0.24273500  | -3.46290100 | 1.00001000  |
| H | 1.68234700  | -2.50818000 | 0.58381700  |
| H | -1.47295500 | -2.37159500 | 2.85550800  |
| H | -1.46133800 | -0.58984900 | 2.78297200  |
| H | 0.69523100  | -0.51174300 | 1.71179500  |
| N | -0.06352100 | -1.89927300 | -0.37985000 |
| N | -2.07559600 | -1.11581200 | -1.30994200 |
| N | -1.90022400 | -1.56079700 | 0.97789000  |

|   |             |             |             |
|---|-------------|-------------|-------------|
| H | -2.90150900 | -1.40783600 | 1.01018400  |
| C | 4.94673000  | 1.75721400  | -0.33617900 |
| C | 3.82218400  | 1.00184100  | 0.02073900  |
| C | 3.97294600  | -0.36644400 | 0.25260300  |
| C | 5.21852200  | -0.98933700 | 0.10929800  |
| C | 6.33717800  | -0.22594800 | -0.26372700 |
| C | 6.19602100  | 1.14425800  | -0.48312500 |
| H | 4.81145800  | 2.82894400  | -0.49251700 |
| H | 3.09908700  | -0.93446300 | 0.55800100  |
| H | 7.30155400  | -0.72518200 | -0.37286900 |
| H | 7.06622800  | 1.74034200  | -0.76874400 |
| C | 2.44675900  | 1.64391400  | 0.16663500  |
| C | 5.39336300  | -2.44445700 | 0.33415800  |
| O | 1.46718500  | 0.87242000  | 0.27816700  |
| O | 6.43887300  | -3.04744400 | 0.26162100  |
| O | 2.42706600  | 2.90727400  | 0.14504300  |
| H | 1.14048100  | 3.54095900  | 0.63762700  |
| O | 4.23144500  | -3.08824800 | 0.63435000  |
| H | 4.47808400  | -4.01916200 | 0.76352900  |

### INT3

Charge: -1 Multiplicity: 1

|   |             |             |             |
|---|-------------|-------------|-------------|
| C | 1.10501700  | -2.93401900 | -0.52535900 |
| C | -0.18508200 | -2.40090000 | -0.45581400 |
| C | -0.48654200 | -1.19985700 | -1.15508800 |

|   |             |             |             |
|---|-------------|-------------|-------------|
| C | 0.52625400  | -0.60651700 | -1.95849900 |
| C | 1.80132300  | -1.17835700 | -1.99934400 |
| C | 2.12291500  | -2.33915600 | -1.28492400 |
| H | 1.32507700  | -3.84963400 | 0.03563300  |
| H | 2.57263400  | -0.69245800 | -2.60663700 |
| C | -4.09638300 | 0.53876600  | -0.61900100 |
| C | -3.95699700 | 1.60634100  | 0.26389900  |
| C | -4.93117300 | 1.80840200  | 1.24951800  |
| C | -5.98725600 | 0.90038400  | 1.37600200  |
| C | -6.04853900 | -0.23385900 | 0.55887200  |
| C | -5.07866400 | -0.43043200 | -0.43280000 |
| H | -3.37890000 | 0.41738900  | -1.42241200 |
| H | -4.81720000 | 2.65312500  | 1.93181800  |
| H | -6.74318300 | 1.05186200  | 2.15131500  |
| H | -6.82388100 | -0.99184000 | 0.68897800  |
| C | -2.69190000 | 2.41653600  | 0.25877200  |
| C | -5.01920700 | -1.71480600 | -1.21568900 |
| O | -1.63110600 | 1.81488900  | -0.28202100 |
| O | -5.99190100 | -2.42482900 | -1.36427200 |
| O | -2.61480300 | 3.51745400  | 0.76058500  |
| H | -1.72054900 | 0.82071000  | -0.57751200 |
| O | -3.82693400 | -2.04087900 | -1.70730300 |
| H | -3.03276000 | -1.48100900 | -1.40173300 |
| O | -1.68174100 | -0.63928300 | -1.05077300 |

|   |             |             |             |
|---|-------------|-------------|-------------|
| C | 3.79709300  | 0.91766000  | 0.11240000  |
| C | 3.71636700  | -0.19330100 | 0.95009500  |
| C | 2.49963800  | -0.56438300 | 1.52335000  |
| C | 1.35607000  | 0.21149900  | 1.28758300  |
| C | 1.42494100  | 1.33631800  | 0.44469000  |
| C | 2.64382600  | 1.66918900  | -0.13839900 |
| H | 4.74564900  | 1.18997400  | -0.35083500 |
| H | 2.42339100  | -1.44890900 | 2.15313700  |
| H | 0.51678200  | 1.90648000  | 0.24170000  |
| N | 0.18040600  | -0.13192800 | 1.89799200  |
| C | -0.95014500 | -0.09586000 | 2.27498900  |
| S | -2.42343800 | -0.11694500 | 2.85253100  |
| C | 4.96559900  | -0.96046900 | 1.28541400  |
| C | 2.74451900  | 2.82161600  | -1.10176500 |
| C | -1.27321600 | -3.06657400 | 0.34239300  |
| H | -1.78499100 | -2.35088400 | 1.00300300  |
| H | -2.05717700 | -3.47445300 | -0.31802500 |
| H | -0.87482100 | -3.89174300 | 0.95314800  |
| C | 0.19197400  | 0.61829300  | -2.76719200 |
| H | -0.69630300 | 0.43394400  | -3.39478800 |
| H | -0.06260000 | 1.48387900  | -2.13628500 |
| H | 1.03115300  | 0.90788300  | -3.41604500 |
| C | 3.50007800  | -2.94879000 | -1.36770700 |
| H | 4.27694000  | -2.17795800 | -1.48923100 |

|   |            |             |             |
|---|------------|-------------|-------------|
| H | 3.74411800 | -3.52226700 | -0.46043500 |
| H | 3.59438400 | -3.63948700 | -2.22633100 |
| F | 3.04268000 | 2.39370500  | -2.34805700 |
| F | 3.73700900 | 3.67039800  | -0.75067800 |
| F | 1.61682000 | 3.53459200  | -1.18054100 |
| F | 5.63149300 | -0.39548000 | 2.31707500  |
| F | 4.70817800 | -2.23010400 | 1.64562400  |
| F | 5.83084500 | -0.99923700 | 0.25291000  |

## TS2

Charge: -1 Multiplicity: 1

|   |             |             |             |
|---|-------------|-------------|-------------|
| C | 0.38409800  | -2.50603200 | -1.15145700 |
| C | -0.42821100 | -1.73855700 | -0.31441600 |
| C | -0.38096300 | -0.31844800 | -0.39778900 |
| C | 0.46825500  | 0.28150400  | -1.37004000 |
| C | 1.26433900  | -0.53341500 | -2.18050400 |
| C | 1.25090900  | -1.92998300 | -2.08890200 |
| H | 0.34570300  | -3.59695500 | -1.06097900 |
| H | 1.93180200  | -0.05370100 | -2.90410400 |
| C | -4.05531700 | 0.49349800  | 0.00408500  |
| C | -3.89482200 | 1.36083900  | -1.08367700 |
| C | -4.53354600 | 1.07353700  | -2.29575400 |
| C | -5.30279700 | -0.08403100 | -2.42947600 |
| C | -5.46680200 | -0.94026600 | -1.34206900 |
| C | -4.84802800 | -0.65490100 | -0.11443300 |

|   |             |             |             |
|---|-------------|-------------|-------------|
| H | -3.56030000 | 0.74135600  | 0.94240300  |
| H | -4.41545000 | 1.77927900  | -3.12011100 |
| H | -5.78576300 | -0.31336400 | -3.38282400 |
| H | -6.07963900 | -1.84043200 | -1.40893900 |
| C | -3.11416400 | 2.64879900  | -0.96908400 |
| C | -5.11782000 | -1.60316100 | 1.02136800  |
| O | -2.14310700 | 2.68067700  | -0.07354300 |
| O | -5.93999200 | -2.48684400 | 0.93463200  |
| O | -3.39734500 | 3.60680200  | -1.65979700 |
| H | -1.76267000 | 1.75828600  | 0.15911200  |
| O | -4.42341900 | -1.45356200 | 2.15797800  |
| H | -3.73084500 | -0.76119800 | 2.14274400  |
| O | -1.09521200 | 0.42091900  | 0.44529100  |
| C | 3.91676600  | 0.29927500  | 0.09607500  |
| C | 3.46843900  | -0.96646900 | 0.48728800  |
| C | 2.35032900  | -1.10890700 | 1.30272700  |
| C | 1.63333600  | 0.02739200  | 1.71376000  |
| C | 2.10635600  | 1.30448700  | 1.36288900  |
| C | 3.23392100  | 1.42770100  | 0.55392400  |
| H | 4.77569000  | 0.40041200  | -0.56710400 |
| H | 1.98133800  | -2.09525700 | 1.57703700  |
| H | 1.55729100  | 2.18456300  | 1.69338600  |
| N | 0.50008500  | -0.10984300 | 2.48386300  |
| C | -0.67744200 | 0.23899400  | 2.41421400  |

|   |             |             |             |
|---|-------------|-------------|-------------|
| S | -2.06211400 | 0.58252100  | 3.18570400  |
| C | 4.23444900  | -2.18154200 | 0.04253100  |
| C | 3.73001900  | 2.78556100  | 0.13733100  |
| C | -1.31898300 | -2.39909700 | 0.70034400  |
| H | -0.84842800 | -2.43233100 | 1.69889200  |
| H | -2.25568600 | -1.84592200 | 0.82631200  |
| H | -1.55549400 | -3.43407100 | 0.41090700  |
| C | 0.51579900  | 1.77671400  | -1.52187700 |
| H | -0.33070500 | 2.15208000  | -2.12145600 |
| H | 0.44202700  | 2.28760700  | -0.55305400 |
| H | 1.44632000  | 2.09142100  | -2.01633300 |
| C | 2.10512300  | -2.78640500 | -2.99005300 |
| H | 2.95261500  | -2.21544000 | -3.39834600 |
| H | 2.51842800  | -3.65062400 | -2.44708300 |
| H | 1.52708500  | -3.18156500 | -3.84536600 |
| F | 3.90228500  | 2.86304900  | -1.19961200 |
| F | 4.93206100  | 3.06744300  | 0.68753800  |
| F | 2.89494600  | 3.77375800  | 0.49068800  |
| F | 5.31345300  | -2.40370600 | 0.82804200  |
| F | 3.49602200  | -3.30372700 | 0.08021000  |
| F | 4.70490600  | -2.04926500 | -1.21374700 |

#### INT4

Charge: -1 Multiplicity: 1

|   |             |             |            |
|---|-------------|-------------|------------|
| C | -0.17155300 | -2.34925400 | 1.13180900 |
|---|-------------|-------------|------------|



|   |             |             |             |
|---|-------------|-------------|-------------|
| C | 0.54670100  | -1.55880800 | 0.22731500  |
| C | 0.45047000  | -0.16333500 | 0.35927500  |
| C | -0.28276500 | 0.43592100  | 1.39708600  |
| C | -0.98758200 | -0.40007600 | 2.26920300  |
| C | -0.96068300 | -1.79444100 | 2.14480100  |
| H | -0.12481600 | -3.43689300 | 1.02390700  |
| H | -1.58950200 | 0.05857800  | 3.05941300  |
| C | 4.09491600  | 0.53221800  | 0.10643900  |
| C | 3.49713100  | 1.23430200  | 1.15527300  |
| C | 3.22972700  | 0.57240400  | 2.35929400  |
| C | 3.53236800  | -0.78437700 | 2.49697100  |
| C | 4.09823100  | -1.48722600 | 1.43317200  |
| C | 4.36594600  | -0.83212800 | 0.22252400  |
| H | 4.31280700  | 1.04583600  | -0.82617500 |
| H | 2.76607800  | 1.13635200  | 3.17019500  |
| H | 3.30197800  | -1.30120000 | 3.43147100  |
| H | 4.32500400  | -2.55224500 | 1.50852400  |
| C | 3.08614600  | 2.67075000  | 1.00464700  |
| C | 4.90195800  | -1.62562200 | -0.93381900 |
| O | 2.91277200  | 3.12810100  | -0.23701300 |
| O | 5.53399600  | -2.64658700 | -0.78125900 |
| O | 2.91093700  | 3.38979700  | 1.96500600  |
| H | 2.82236200  | 2.42403500  | -0.93288500 |
| O | 4.63156000  | -1.16068800 | -2.15950200 |

|   |             |             |             |
|---|-------------|-------------|-------------|
| H | 3.94099000  | -0.44568800 | -2.19502000 |
| O | 1.12546700  | 0.67727100  | -0.50219700 |
| C | -3.81704900 | 0.10942700  | -0.27354100 |
| C | -3.21236600 | -1.05526400 | -0.75557600 |
| C | -2.03405500 | -1.00273500 | -1.49547900 |
| C | -1.38092100 | 0.22607600  | -1.72401500 |
| C | -2.02055900 | 1.40362000  | -1.27647300 |
| C | -3.21378100 | 1.33716900  | -0.56044500 |
| H | -4.73255800 | 0.05956400  | 0.31507000  |
| H | -1.56324800 | -1.91938200 | -1.84637500 |
| H | -1.54770100 | 2.36455800  | -1.47515600 |
| N | -0.18516600 | 0.28888800  | -2.40469200 |
| C | 0.94236400  | 0.62528500  | -1.88778800 |
| S | 2.35525200  | 1.09884000  | -2.75634000 |
| C | -3.85721200 | -2.38485700 | -0.48063800 |
| C | -3.84408600 | 2.58721500  | -0.01242300 |
| C | 1.33807500  | -2.20031400 | -0.87896700 |
| H | 0.71399100  | -2.36228400 | -1.77406000 |
| H | 2.17265200  | -1.57262600 | -1.20323900 |
| H | 1.73795500  | -3.17418500 | -0.56120200 |
| C | -0.30734600 | 1.93122100  | 1.55945900  |
| H | 0.51015600  | 2.27519000  | 2.21425500  |
| H | -0.16070700 | 2.44085800  | 0.59911600  |
| H | -1.25968600 | 2.26227300  | 1.99617500  |

|   |             |             |             |
|---|-------------|-------------|-------------|
| C | -1.79955400 | -2.66953400 | 3.04195700  |
| H | -1.92116000 | -2.22648000 | 4.04289600  |
| H | -2.80848800 | -2.80625100 | 2.61691600  |
| H | -1.35539000 | -3.67003300 | 3.16121300  |
| F | -3.71385300 | 2.66397300  | 1.33306300  |
| F | -5.17114000 | 2.63098200  | -0.25936800 |
| F | -3.30860300 | 3.70804400  | -0.52050200 |
| F | -4.79973100 | -2.69454400 | -1.39763800 |
| F | -2.97275600 | -3.39822300 | -0.48134400 |
| F | -4.47986700 | -2.40496600 | 0.72007700  |

## INT5

Charge: -1 Multiplicity: 1

|   |             |             |             |
|---|-------------|-------------|-------------|
| C | -2.81593600 | 2.75967400  | -2.19824800 |
| C | -2.31426200 | 1.46145800  | -2.03220800 |
| C | -1.82480900 | 1.10262800  | -0.76982700 |
| C | -1.81586000 | 1.99985800  | 0.31138600  |
| C | -2.32995400 | 3.28228700  | 0.09539000  |
| C | -2.83470700 | 3.68388400  | -1.14889500 |
| H | -3.20257100 | 3.05143200  | -3.17962000 |
| H | -2.34043800 | 3.98816900  | 0.93211800  |
| C | -3.45325500 | -1.86889400 | 0.88373900  |
| C | -3.64889900 | -1.06088900 | 2.00473300  |
| C | -4.54585900 | 0.01460700  | 1.93112500  |
| C | -5.20655000 | 0.29252700  | 0.73452400  |

|   |             |             |             |
|---|-------------|-------------|-------------|
| C | -4.97677000 | -0.49896800 | -0.39310900 |
| C | -4.08577400 | -1.57636500 | -0.32646100 |
| H | -2.76603600 | -2.70961600 | 0.93927800  |
| H | -4.69189400 | 0.63082600  | 2.82007500  |
| H | -5.88504400 | 1.14635900  | 0.67136000  |
| H | -5.46209000 | -0.28517400 | -1.34675400 |
| C | -2.88808000 | -1.28594000 | 3.27906000  |
| C | -3.78576900 | -2.34910600 | -1.57810100 |
| O | -1.69015300 | -1.87542900 | 3.16927300  |
| O | -4.55566300 | -2.37490300 | -2.51478400 |
| O | -3.31197200 | -0.93900500 | 4.35771500  |
| H | -1.34628100 | -1.95489900 | 2.24316400  |
| O | -2.62221700 | -2.99947000 | -1.62780200 |
| H | -1.95390400 | -2.71842500 | -0.94704000 |
| O | -1.47444500 | -0.22083800 | -0.58171500 |
| C | 4.89692100  | -0.00802300 | 0.06965500  |
| C | 4.20028100  | 1.17217400  | 0.34262800  |
| C | 2.81791400  | 1.24074700  | 0.17168100  |
| C | 2.07764800  | 0.12018900  | -0.26179400 |
| C | 2.79035100  | -1.06818500 | -0.54486500 |
| C | 4.17487700  | -1.11643500 | -0.38458200 |
| H | 5.97506300  | -0.06553600 | 0.21426600  |
| H | 2.27469700  | 2.16415800  | 0.37443900  |
| H | 2.24265600  | -1.95014800 | -0.87105500 |

|   |             |             |             |
|---|-------------|-------------|-------------|
| N | 0.72294400  | 0.29195400  | -0.43635600 |
| C | -0.18810100 | -0.60265500 | -0.27639500 |
| S | -0.12143800 | -2.23923100 | 0.29436300  |
| C | 4.95860900  | 2.40024500  | 0.76306200  |
| C | 4.92586900  | -2.36672200 | -0.75573200 |
| C | -2.31986600 | 0.46650400  | -3.16201300 |
| H | -2.36276300 | 0.98101500  | -4.13372500 |
| H | -1.42474500 | -0.17063600 | -3.13868500 |
| H | -3.18931900 | -0.20849400 | -3.10567600 |
| C | -1.26673500 | 1.60386500  | 1.65416000  |
| H | -0.18445100 | 1.80506100  | 1.70069800  |
| H | -1.76135100 | 2.15861700  | 2.46492600  |
| H | -1.38994500 | 0.53196500  | 1.84365600  |
| C | -3.36048900 | 5.08449000  | -1.34811300 |
| H | -3.93243300 | 5.17123500  | -2.28451100 |
| H | -4.01906900 | 5.39053200  | -0.51871400 |
| H | -2.53837100 | 5.82052600  | -1.39337600 |
| F | 5.99164200  | -2.57218500 | 0.04785000  |
| F | 5.41235900  | -2.30051200 | -2.01625900 |
| F | 4.16243200  | -3.46825600 | -0.69431600 |
| F | 4.23248300  | 3.20339800  | 1.56273700  |
| F | 6.09192000  | 2.09588500  | 1.42800000  |
| F | 5.33044500  | 3.15127700  | -0.29761400 |

**INT6**

Charge: -1 Multiplicity: 1

|   |             |             |             |
|---|-------------|-------------|-------------|
| C | -4.58372400 | 0.00136000  | 1.33174500  |
| C | -4.99961900 | 1.15502400  | 0.53484300  |
| C | -4.09691000 | 2.13811100  | 0.24252300  |
| C | -2.72659200 | 2.07621500  | 0.67643900  |
| C | -2.31574500 | 0.90670500  | 1.40981500  |
| C | -3.19195900 | -0.07868400 | 1.76762200  |
| H | -4.40860100 | 2.97501900  | -0.38507600 |
| H | -1.26140300 | 0.82597200  | 1.68023900  |
| C | -6.42188000 | 1.18672800  | 0.05379200  |
| H | -6.64174900 | 0.34276500  | -0.61996900 |
| H | -7.12227000 | 1.08171500  | 0.89869800  |
| H | -6.64158000 | 2.12337800  | -0.47907800 |
| C | -2.79352100 | -1.28873800 | 2.56012000  |
| H | -3.36041100 | -1.34153200 | 3.50452500  |
| H | -3.03294700 | -2.21037400 | 2.00837100  |
| H | -1.71847800 | -1.28114900 | 2.78602700  |
| C | -1.78082200 | 3.04773600  | 0.38086100  |
| H | -0.74672500 | 2.80621900  | 0.62611500  |
| C | -2.03992000 | 4.43439600  | -0.02382000 |
| C | -1.09919300 | 5.14081700  | -0.80390600 |
| C | -3.17075900 | 5.13661100  | 0.44432800  |
| C | -1.29764500 | 6.48125600  | -1.12385400 |
| H | -0.24203000 | 4.59173800  | -1.19648200 |

|   |             |             |             |
|---|-------------|-------------|-------------|
| C | -3.36678600 | 6.48071900  | 0.12174400  |
| H | -3.87979300 | 4.63103900  | 1.10066900  |
| C | -2.43511100 | 7.15840100  | -0.66791100 |
| H | -0.56199100 | 7.00190600  | -1.74228200 |
| H | -4.24885600 | 7.00328100  | 0.50097300  |
| H | -2.58990100 | 8.21019700  | -0.92231700 |
| O | -5.38602800 | -0.92575400 | 1.60625100  |
| C | -2.78085100 | -2.48702200 | -0.78149600 |
| C | -4.17191500 | -2.33372200 | -0.79490500 |
| C | -5.00275800 | -3.40700600 | -0.45287600 |
| C | -4.43049000 | -4.64818400 | -0.14239200 |
| C | -3.04266000 | -4.79985600 | -0.11374600 |
| C | -2.21618400 | -3.71909100 | -0.42101100 |
| H | -4.59148200 | -1.36834800 | -1.07262500 |
| H | -5.09507600 | -5.48423600 | 0.08421500  |
| H | -2.60343600 | -5.76449200 | 0.15216000  |
| H | -1.12854100 | -3.80530800 | -0.39178500 |
| C | -6.50576800 | -3.28980400 | -0.44687200 |
| C | -1.85591100 | -1.35269800 | -1.08937200 |
| O | -7.21061000 | -4.19361400 | -0.83865400 |
| O | -0.66030800 | -1.41898200 | -0.86333900 |
| O | -7.01294100 | -2.14482800 | 0.00232800  |
| H | -6.37608600 | -1.62968600 | 0.59078400  |
| O | -2.45199800 | -0.29563900 | -1.61285700 |

|   |             |             |             |
|---|-------------|-------------|-------------|
| H | -1.77502000 | 0.43562000  | -1.75709700 |
| C | 4.21350600  | 2.20708200  | 1.41993500  |
| C | 3.00539800  | 2.32459700  | 0.72394600  |
| C | 2.06727500  | 1.28744100  | 0.85384000  |
| C | 2.27706200  | 0.19910600  | 1.71465200  |
| C | 3.50387100  | 0.12535900  | 2.38401700  |
| C | 4.49366800  | 1.10411500  | 2.23457000  |
| H | 4.96634300  | 2.99162100  | 1.30184700  |
| H | 3.69612600  | -0.74078300 | 3.02417500  |
| O | 0.88669900  | 1.34940200  | 0.13229100  |
| C | 4.77074400  | -2.03845700 | -0.42844800 |
| C | 5.12888700  | -0.74738800 | -0.82541500 |
| C | 4.18110800  | 0.14286600  | -1.32790400 |
| C | 2.82128800  | -0.22064800 | -1.39780900 |
| C | 2.46617200  | -1.54002200 | -1.03496300 |
| C | 3.43048900  | -2.42107900 | -0.55424400 |
| H | 5.51545000  | -2.72633900 | -0.03021900 |
| H | 4.47130100  | 1.15161500  | -1.61837200 |
| H | 1.41997500  | -1.83153000 | -1.10437500 |
| N | 1.87358600  | 0.64949200  | -1.88616300 |
| C | 0.92695600  | 1.24242100  | -1.26744100 |
| S | -0.40423700 | 2.03378800  | -2.04118800 |
| C | 6.56597600  | -0.31804100 | -0.73965400 |
| C | 3.02076100  | -3.78438700 | -0.07074300 |



|   |            |             |             |
|---|------------|-------------|-------------|
| C | 2.72986000 | 3.50245900  | -0.17115500 |
| H | 2.74182200 | 3.21289500  | -1.23486300 |
| H | 1.73240600 | 3.92583400  | 0.02118800  |
| H | 3.48075300 | 4.29152200  | -0.02050100 |
| C | 1.21917500 | -0.85216100 | 1.91168000  |
| H | 0.58247700 | -0.59197300 | 2.77582700  |
| H | 0.56290200 | -0.94586700 | 1.03795000  |
| H | 1.67405800 | -1.83028600 | 2.11789800  |
| C | 5.83693600 | 0.94704800  | 2.90122300  |
| H | 5.73558500 | 0.58561900  | 3.93721600  |
| H | 6.45841700 | 0.21558000  | 2.35859100  |
| H | 6.39080200 | 1.89773000  | 2.92204400  |
| F | 2.91195000 | -3.82477600 | 1.28070000  |
| F | 3.92661600 | -4.73080600 | -0.39664800 |
| F | 1.83642500 | -4.18152600 | -0.56429400 |
| F | 7.24556000 | -0.56882200 | -1.87939800 |
| F | 6.69635400 | 1.00159100  | -0.50082400 |
| F | 7.23172800 | -0.96217100 | 0.24634900  |

### TS3

Charge: -1 Multiplicity: 1

|   |             |            |             |
|---|-------------|------------|-------------|
| C | -4.64824200 | 0.13795100 | 1.13811200  |
| C | -4.90562300 | 1.21582800 | 0.20419400  |
| C | -3.91817300 | 2.13515400 | -0.07577000 |
| C | -2.63117400 | 2.07811900 | 0.53010100  |

|   |             |             |             |
|---|-------------|-------------|-------------|
| C | -2.37407800 | 0.99477400  | 1.41739300  |
| C | -3.33232900 | 0.05798700  | 1.73674400  |
| H | -4.12204400 | 2.91671200  | -0.81249400 |
| H | -1.37261800 | 0.90617200  | 1.84589600  |
| C | -6.26316300 | 1.26941000  | -0.43871100 |
| H | -6.46162500 | 0.37608500  | -1.05393900 |
| H | -7.05765500 | 1.27969900  | 0.32626600  |
| H | -6.37064400 | 2.15958100  | -1.07674900 |
| C | -3.07027600 | -1.09011400 | 2.66797700  |
| H | -3.77644800 | -1.08057600 | 3.51493100  |
| H | -3.22941200 | -2.05146200 | 2.15329600  |
| H | -2.04124700 | -1.06546100 | 3.05682600  |
| C | -1.57542900 | 2.98714600  | 0.21728300  |
| H | -0.65694900 | 2.81239000  | 0.77939100  |
| C | -1.80077900 | 4.42677300  | -0.10727400 |
| C | -0.80911000 | 5.20478300  | -0.73724700 |
| C | -2.96324500 | 5.08515700  | 0.33778900  |
| C | -0.97878700 | 6.57447900  | -0.92923000 |
| H | 0.08830400  | 4.70738200  | -1.10624200 |
| C | -3.13600100 | 6.45781300  | 0.13993400  |
| H | -3.72691900 | 4.51658100  | 0.86774300  |
| C | -2.14784500 | 7.21007800  | -0.49685400 |
| H | -0.19418500 | 7.14963900  | -1.42789900 |
| H | -4.05030300 | 6.94025800  | 0.49542500  |

|   |             |             |             |
|---|-------------|-------------|-------------|
| H | -2.28405500 | 8.28333500  | -0.65340200 |
| O | -5.52862300 | -0.73790500 | 1.41258100  |
| C | -2.81705600 | -2.45487500 | -0.68272100 |
| C | -4.20602900 | -2.30384800 | -0.76245300 |
| C | -5.05300200 | -3.34559600 | -0.37179800 |
| C | -4.49603600 | -4.55946500 | 0.05170900  |
| C | -3.10999800 | -4.71069200 | 0.14231300  |
| C | -2.26791900 | -3.65661700 | -0.21156900 |
| H | -4.61268500 | -1.36130300 | -1.12166600 |
| H | -5.17256700 | -5.37443300 | 0.31677600  |
| H | -2.68481400 | -5.65372000 | 0.49488000  |
| H | -1.18246900 | -3.74403300 | -0.13750100 |
| C | -6.55680600 | -3.21553500 | -0.42836900 |
| C | -1.89260200 | -1.33934700 | -1.02918000 |
| O | -7.24993200 | -4.15923800 | -0.74967800 |
| O | -0.70746300 | -1.35281700 | -0.74157900 |
| O | -7.05904800 | -2.03059300 | -0.12476900 |
| H | -6.43158800 | -1.45116500 | 0.45153300  |
| O | -2.47228200 | -0.33784700 | -1.67602400 |
| H | -1.82372700 | 0.40907700  | -1.76357900 |
| C | 4.30586800  | 1.96623000  | 1.56661500  |
| C | 3.08114300  | 2.18002600  | 0.92531400  |
| C | 2.10614400  | 1.17670000  | 1.02931200  |
| C | 2.28709100  | 0.02800200  | 1.81150300  |

|   |             |             |             |
|---|-------------|-------------|-------------|
| C | 3.53442200  | -0.14218000 | 2.42441600  |
| C | 4.56215700  | 0.80009300  | 2.29766500  |
| H | 5.08934200  | 2.72285700  | 1.46992400  |
| H | 3.70921100  | -1.05507500 | 3.00092500  |
| O | 0.90128500  | 1.33759900  | 0.35371500  |
| C | 4.69925500  | -2.05732100 | -0.58804200 |
| C | 5.04730700  | -0.75388200 | -0.94851300 |
| C | 4.07928500  | 0.16357000  | -1.35725200 |
| C | 2.71902700  | -0.19303900 | -1.36849700 |
| C | 2.37000000  | -1.52157400 | -1.04642900 |
| C | 3.35167400  | -2.42706400 | -0.65352400 |
| H | 5.45854100  | -2.76549300 | -0.25876500 |
| H | 4.36096800  | 1.18308400  | -1.61726300 |
| H | 1.31856300  | -1.80219000 | -1.06916900 |
| N | 1.74675300  | 0.71371700  | -1.75511100 |
| C | 0.88125900  | 1.29174900  | -1.02443000 |
| S | -0.46957100 | 2.16384900  | -1.72137900 |
| C | 6.49013300  | -0.33404800 | -0.92262400 |
| C | 2.95535600  | -3.80173600 | -0.18911000 |
| C | 2.82513300  | 3.42280400  | 0.11574800  |
| H | 2.77843300  | 3.20116200  | -0.96352100 |
| H | 1.86112500  | 3.88317600  | 0.38109700  |
| H | 3.62061500  | 4.16414300  | 0.27724000  |
| C | 1.18332400  | -0.97843700 | 1.98747300  |

|   |            |             |             |
|---|------------|-------------|-------------|
| H | 0.55500800 | -0.70524500 | 2.85345100  |
| H | 0.52008100 | -1.02749300 | 1.11520800  |
| H | 1.59587100 | -1.97874700 | 2.17553400  |
| C | 5.92230900 | 0.54105700  | 2.89413100  |
| H | 5.84795100 | 0.02133500  | 3.86221900  |
| H | 6.52487900 | -0.09554500 | 2.22482800  |
| H | 6.48136200 | 1.47659400  | 3.04762300  |
| F | 2.91393900 | -3.87491200 | 1.16387000  |
| F | 3.83751100 | -4.74251600 | -0.58574900 |
| F | 1.74566900 | -4.17465200 | -0.63448000 |
| F | 7.09569200 | -0.50980200 | -2.11565800 |
| F | 6.63929000 | 0.96721700  | -0.60622100 |
| F | 7.20933800 | -1.04204200 | -0.02306600 |

### INT7

Charge: -1 Multiplicity: 1

|   |             |            |             |
|---|-------------|------------|-------------|
| C | -4.69148200 | 0.25479000 | 0.96622700  |
| C | -4.83419700 | 1.26692100 | -0.04385700 |
| C | -3.77552600 | 2.12202500 | -0.33026500 |
| C | -2.54740400 | 2.04609400 | 0.35416700  |
| C | -2.40706600 | 1.05480700 | 1.34147600  |
| C | -3.43553300 | 0.17293700 | 1.65500200  |
| H | -3.90500400 | 2.87180300 | -1.11832800 |
| H | -1.44909100 | 0.95721500 | 1.86083900  |

|   |             |             |             |
|---|-------------|-------------|-------------|
| C | -6.14901200 | 1.35008200  | -0.76915900 |
| H | -6.36148800 | 0.43262300  | -1.34396300 |
| H | -6.98375700 | 1.44217800  | -0.05356400 |
| H | -6.17641900 | 2.20578100  | -1.46169100 |
| C | -3.28022000 | -0.90903000 | 2.68495100  |
| H | -4.05770900 | -0.82948300 | 3.46318800  |
| H | -3.41606400 | -1.90353000 | 2.22802700  |
| H | -2.28790500 | -0.87493100 | 3.16196200  |
| C | -1.37500200 | 2.90197200  | -0.00051800 |
| H | -0.60264500 | 2.77618100  | 0.76685200  |
| C | -1.61446400 | 4.39714100  | -0.17324200 |
| C | -0.71123100 | 5.22494400  | -0.86054100 |
| C | -2.70665200 | 5.00269000  | 0.46995700  |
| C | -0.89443800 | 6.60863100  | -0.90960600 |
| H | 0.14065300  | 4.77453100  | -1.37250400 |
| C | -2.89114800 | 6.38665700  | 0.42063400  |
| H | -3.41380200 | 4.37597500  | 1.01345200  |
| C | -1.98828300 | 7.19788200  | -0.27071300 |
| H | -0.17751800 | 7.22808500  | -1.45518000 |
| H | -3.75176600 | 6.83151700  | 0.92715500  |
| H | -2.13656800 | 8.28007000  | -0.31307600 |
| O | -5.63777500 | -0.57334300 | 1.25276500  |
| C | -2.84856200 | -2.44539200 | -0.59208000 |
| C | -4.23235000 | -2.28381300 | -0.72692900 |

|   |             |             |             |
|---|-------------|-------------|-------------|
| C | -5.10733300 | -3.28147400 | -0.29072900 |
| C | -4.58103400 | -4.46918000 | 0.23304400  |
| C | -3.19993400 | -4.63268000 | 0.37697000  |
| C | -2.33015100 | -3.61734200 | -0.02074200 |
| H | -4.61583800 | -1.36231800 | -1.15696800 |
| H | -5.27884400 | -5.25332800 | 0.53389100  |
| H | -2.80065100 | -5.55466400 | 0.80742200  |
| H | -1.24896700 | -3.71545200 | 0.09336600  |
| C | -6.60882400 | -3.12034000 | -0.40384700 |
| C | -1.91399400 | -1.35964300 | -0.98025900 |
| O | -7.30791400 | -4.08558600 | -0.65418300 |
| O | -0.74312600 | -1.32049900 | -0.63576100 |
| O | -7.07713100 | -1.90545000 | -0.23599500 |
| H | -6.44378400 | -1.27216800 | 0.34854000  |
| O | -2.46540800 | -0.42654200 | -1.75068900 |
| H | -1.84897900 | 0.33633500  | -1.80785800 |
| C | 4.36038900  | 1.85102000  | 1.61768700  |
| C | 3.12291800  | 2.09828500  | 1.01366200  |
| C | 2.14104300  | 1.10430500  | 1.12272900  |
| C | 2.31804400  | -0.06624500 | 1.87007700  |
| C | 3.57957700  | -0.26869900 | 2.44353200  |
| C | 4.61720800  | 0.66251800  | 2.31193700  |
| H | 5.15192200  | 2.59884900  | 1.52018200  |
| H | 3.75577600  | -1.19725300 | 2.99358500  |

|   |             |             |             |
|---|-------------|-------------|-------------|
| O | 0.91746400  | 1.29720400  | 0.47774600  |
| C | 4.64391800  | -2.07579600 | -0.66317200 |
| C | 4.99063100  | -0.77010400 | -1.01366300 |
| C | 4.01549200  | 0.15872100  | -1.37982300 |
| C | 2.65745800  | -0.19488000 | -1.35647900 |
| C | 2.30585300  | -1.52278500 | -1.04504500 |
| C | 3.29363900  | -2.43885500 | -0.69331100 |
| H | 5.40823100  | -2.79250700 | -0.36515800 |
| H | 4.29466100  | 1.18118500  | -1.63106400 |
| H | 1.25147400  | -1.79526000 | -1.03787600 |
| N | 1.67334400  | 0.73315100  | -1.68558400 |
| C | 0.86961800  | 1.29014100  | -0.87927100 |
| S | -0.48437300 | 2.21344400  | -1.55169300 |
| C | 6.43587800  | -0.35583100 | -1.02038100 |
| C | 2.90510400  | -3.81762100 | -0.23155800 |
| C | 2.86401500  | 3.36223900  | 0.23764900  |
| H | 2.83613900  | 3.17251200  | -0.84872000 |
| H | 1.89323600  | 3.80887400  | 0.50200000  |
| H | 3.65092800  | 4.10512000  | 0.42981800  |
| C | 1.19967300  | -1.05493500 | 2.05245100  |
| H | 0.57465900  | -0.76524200 | 2.91517900  |
| H | 0.53136900  | -1.10002300 | 1.18332100  |
| H | 1.59832200  | -2.05956800 | 2.24697200  |
| C | 5.98870300  | 0.37033600  | 2.86534900  |



|   |            |             |             |
|---|------------|-------------|-------------|
| H | 5.93305100 | -0.20123200 | 3.80471400  |
| H | 6.57577800 | -0.22921200 | 2.14952600  |
| H | 6.55282200 | 1.29556400  | 3.05759500  |
| F | 2.92758300 | -3.90708200 | 1.12015900  |
| F | 3.76025900 | -4.75787700 | -0.68294800 |
| F | 1.67370800 | -4.17064600 | -0.62590300 |
| F | 7.00049000 | -0.49414000 | -2.23714000 |
| F | 6.59734600 | 0.93442700  | -0.66707300 |
| F | 7.17878300 | -1.09408300 | -0.16713800 |

### INT8

Charge: -1 Multiplicity: 1

|   |             |             |             |
|---|-------------|-------------|-------------|
| C | 1.43218300  | -3.33320500 | 1.51550900  |
| C | 1.19753400  | -3.48777200 | 0.12897200  |
| C | 1.90763400  | -2.68822100 | -0.76841400 |
| C | 2.85942200  | -1.75653900 | -0.33726400 |
| C | 3.12461800  | -1.66381600 | 1.03606100  |
| C | 2.42953800  | -2.43790100 | 1.96511500  |
| H | 1.69232600  | -2.77104700 | -1.83822700 |
| H | 3.84114400  | -0.92022900 | 1.39619300  |
| C | 0.16549400  | -4.47887800 | -0.33602200 |
| H | 0.38818100  | -5.48405000 | 0.06110600  |
| H | -0.83565900 | -4.21856600 | 0.03718800  |
| H | 0.13098900  | -4.53464200 | -1.43497900 |
| C | 2.61927000  | -2.26612000 | 3.44601500  |

|   |             |             |             |
|---|-------------|-------------|-------------|
| H | 3.39322000  | -1.51517400 | 3.66834900  |
| H | 1.66986600  | -1.94973700 | 3.90882200  |
| H | 2.89397900  | -3.21615300 | 3.93322000  |
| C | 3.51518800  | -0.84674500 | -1.33929700 |
| H | 2.94173300  | -0.88154100 | -2.27545300 |
| C | 4.98357100  | -1.09089400 | -1.65231100 |
| C | 5.58692700  | -0.40101100 | -2.71815500 |
| C | 5.75504200  | -2.00728700 | -0.92666200 |
| C | 6.92468200  | -0.61753400 | -3.04715700 |
| H | 4.99438400  | 0.32020200  | -3.28706500 |
| C | 7.09718800  | -2.22517000 | -1.25499800 |
| H | 5.29232700  | -2.55700000 | -0.10642300 |
| C | 7.68801000  | -1.53229700 | -2.31314400 |
| H | 7.37446000  | -0.07177100 | -3.88093500 |
| H | 7.68218700  | -2.94587400 | -0.67752200 |
| H | 8.73697500  | -1.70418900 | -2.56847000 |
| O | 0.72383800  | -4.01099500 | 2.42510800  |
| C | -4.78308700 | 0.17406700  | 1.33958700  |
| C | -3.47976200 | -0.33088500 | 1.44248000  |
| C | -3.26140400 | -1.67968000 | 1.73229200  |
| C | -4.36125700 | -2.52362300 | 1.92585600  |
| C | -5.66505700 | -2.02822800 | 1.82022000  |
| C | -5.88020600 | -0.68310000 | 1.52479600  |
| H | -2.61282400 | 0.30779800  | 1.28333200  |

|   |             |             |             |
|---|-------------|-------------|-------------|
| H | -4.15744100 | -3.57277700 | 2.14733800  |
| H | -6.51840600 | -2.69719800 | 1.96178900  |
| H | -6.88677300 | -0.27170000 | 1.42896500  |
| C | -1.83263700 | -2.21159900 | 1.80054300  |
| C | -5.04545900 | 1.59770200  | 1.01428200  |
| O | -0.91875300 | -1.42020800 | 1.51806800  |
| O | -6.14176500 | 2.09108700  | 0.85435900  |
| O | -1.72048800 | -3.43754300 | 2.12010800  |
| H | -0.29357700 | -3.84084700 | 2.28097300  |
| O | -3.91424800 | 2.32910500  | 0.90235000  |
| H | -4.17807800 | 3.22079700  | 0.62398900  |
| C | 2.31292700  | 2.71782700  | 3.18346600  |
| C | 1.66115700  | 2.16451200  | 2.07608700  |
| C | 1.84314200  | 2.81238500  | 0.84433600  |
| C | 2.60797000  | 3.97194200  | 0.69136400  |
| C | 3.23372400  | 4.48870400  | 1.83422100  |
| C | 3.10417800  | 3.87174000  | 3.08368400  |
| H | 2.19073000  | 2.22994700  | 4.15497700  |
| H | 3.84146900  | 5.39335100  | 1.73899000  |
| O | 1.18262400  | 2.30593200  | -0.27651000 |
| C | -3.30862000 | 0.42426700  | -1.92736800 |
| C | -2.59932200 | 1.62216900  | -1.95500900 |
| C | -1.21124400 | 1.64143200  | -1.78491300 |
| C | -0.50823900 | 0.44204100  | -1.58742000 |

|   |             |             |             |
|---|-------------|-------------|-------------|
| C | -1.22832200 | -0.76844200 | -1.54424500 |
| C | -2.60816600 | -0.76927900 | -1.72101000 |
| H | -4.39141100 | 0.41621300  | -2.04035900 |
| H | -0.67138000 | 2.58648500  | -1.80072800 |
| H | -0.68201600 | -1.68888800 | -1.34816900 |
| N | 0.87961800  | 0.36296900  | -1.49849300 |
| C | 1.63398700  | 1.17005200  | -0.88459300 |
| S | 3.39410200  | 0.94394300  | -0.79382200 |
| C | -3.31354600 | 2.92040400  | -2.20048000 |
| C | -3.36277100 | -2.07101000 | -1.77637300 |
| C | 0.79506100  | 0.94367700  | 2.17140800  |
| H | 0.65387100  | 0.62959600  | 3.21372400  |
| H | -0.19537700 | 1.10986800  | 1.72573900  |
| H | 1.21251900  | 0.08196700  | 1.62968800  |
| C | 2.75283700  | 4.61518500  | -0.66231600 |
| H | 1.77044100  | 4.87284200  | -1.08970600 |
| H | 3.35650200  | 5.53215900  | -0.60026400 |
| H | 3.23994500  | 3.92942800  | -1.37470900 |
| C | 3.79775400  | 4.42619900  | 4.30372700  |
| H | 3.08244700  | 4.61468700  | 5.12152800  |
| H | 4.54854500  | 3.71722000  | 4.69230900  |
| H | 4.31397900  | 5.37207200  | 4.08100200  |
| F | -2.77184300 | -3.04491300 | -1.07264900 |
| F | -3.45788300 | -2.51898000 | -3.05265600 |

|   |             |             |             |
|---|-------------|-------------|-------------|
| F | -4.62436300 | -1.94421000 | -1.32692000 |
| F | -3.04821000 | 3.41766900  | -3.42757200 |
| F | -4.64937600 | 2.80333700  | -2.10636000 |
| F | -2.94294000 | 3.88414500  | -1.32281000 |

## References

1. Uno, T.; Minari, M.; Kubo, M.; Itoh, T. Asymmetric Anionic Polymerization of 2,6-Dimethyl-7phenyl-1,4-benzoquinone Methide. *J. Polym. Sci. Part A: Polym. Chem.* **2004**, *42*, 4548.
2. Gaussian 16, Revision C.02, M. J. Frisch, G. W. Trucks, H. B. Schlegel, G. E. Scuseria, M. A. Robb, J. R. Cheeseman, G. Scalmani, V. Barone, G. A. Petersson, H. Nakatsuji, X. Li, M. Caricato, A. V. Marenich, J. Bloino, B. G. Janesko, R. Gomperts, B. Mennucci, H. P. Hratchian, J. V. Ortiz, A. F. Izmaylov, J. L. Sonnenberg, D. Williams-Young, F. Ding, F. Lipparini, F. Egidi, J. Goings, B. Peng, A. Petrone, T. Henderson, D. Ranasinghe, V. G. Zakrzewski, J. Gao, N. Rega, G. Zheng, W. Liang, M. Hada, M. Ehara, K. Toyota, R. Fukuda, J. Hasegawa, M. Ishida, T. Nakajima, Y. Honda, O. Kitao, H. Nakai, T. Vreven, K. Throssell, J. A. Montgomery, Jr., J. E. Peralta, F. Ogliaro, M. J. Bearpark, J. J. Heyd, E. N. Brothers, K. N. Kudin, V. N. Staroverov, T. A. Keith, R. Kobayashi, J. Normand, K. Raghavachari, A. P. Rendell, J. C. Burant, S. S. Iyengar, J. Tomasi, M. Cossi, J. M. Millam, M. Klene, C. Adamo, R. Cammi, J. W. Ochterski, R. L. Martin, K. Morokuma, O. Farkas, J. B. Foresman, and D. J. Fox, Gaussian, Inc., Wallingford CT, 2019.
3. (a) Neese, F.; Wennmohs, F.; Becker, U.; Riplinger, C. The ORCA quantum chemistry program package. *J. Chem. Phys.* **2020**, *152*, 224108; (b) Neese, F. Software update: The ORCA program system—Version 5.0. *Computational Molecular Science*. **2022**, *12*, e1606; (c) Neese, F.; Wennmohs, F.; Hansen, A.; Becker, U.; Efficient, approximate and parallel Hartree–Fock and hybrid DFT calculations. A ‘chain-of-spheres’ algorithm for the Hartree–Fock exchange. *Chem. Phys.* **2009**, *356*, 98; (d) Izsák, R.; Neese, F. An overlap fitted chain of spheres exchange method. *J. Chem. Phys.* **2011**, *135*, 144105; (e) Izsák, R.; Neese, F.; Klopper, W.; Robust fitting techniques in the chain of spheres approximation to the

- Fock exchange: The role of the complementary space. *J. Chem. Phys.* **2013**, *139*, 094111; (f) Helmich-Paris, B.; de Souza, B.; Neese, F.; Izsák, R. An improved chain of spheres for exchange algorithm. *J. Chem. Phys.* **2021**, *155*, 104109. (g) Hattig, C. Optimization of auxiliary basis sets for RI-MP2 and RI-CC2 calculations: Core–valence and quintuple-f basis sets for H to Ar and QZVPP basis sets for Li to Kr. *Phys. Chem. Chem. Phys.* **2005**, *7*, 59.
- Lee, C.; Yang, W.; Parr, R. G. Development of the Colle-Salvetti correlation-energy formula into a functional of the electron density. *Phys Rev B Condens Matter.* **1988**, *37*, 785.
  - Weigend, F.; Ahlrichs, R. Balanced basis sets of split valence, triple zeta valence and quadruple zeta valence quality for H to Rn: Design and assessment of accuracy. *Phys Chem Chem Phys.* **2005**, *7*, 3297.
  - Grimme, S.; Antony, J.; Ehrlich, S.; Krieg, H. A consistent and accurate *ab initio* parametrization of density functional dispersion correction (DFT-D) for the 94 elements H-Pu. *J Chem Phys.* **2010**, *132*, 154104.
  - (a) Gonzalez, C.; Schlegel, H. B. Reaction path following in mass-weighted internal coordinates. *J. Phys. Chem.* **1990**, *94*, 5523; (b) Fukui, K. The path of chemical reactions - the IRC approach. *Acc. Chem. Res.* **1981**, *14*, 363.
  - Grimme, S. Semiempirical hybrid density functional with perturbative second-order correlation. *J. Chem. Phys.* **2006**, *124*, 034108.
  - (a) Rappoport, D.; Furche, F. Property-optimized Gaussian basis sets for molecular response calculations. *J. Chem. Phys.* **2010**, *133*, 134105; (b) Rappoport, D. Property-optimized Gaussian basis sets for lanthanides. *J. Chem. Phys.* **2021**, *155*, 124102.
  - Caldeweyher, E.; Bannwarth, C.; Grimme, S. Extension of the D3 dispersion coefficient model. *J. Chem. Phys.* **2017**, *147*, 034112.
  - Marenich, A. V.; Cramer, C. J.; Truhlar, D. G. Universal Solvation Model Based on Solute Electron Density and on a Continuum Model of the Solv. *J. Phys. Chem.* **2009**, *113*, 6378.
